# Supplementary material for: Hidden behind the scene – high diversity, low connectivity of deep-sea Amphipoda in the polymetallic nodule fields in the Northeast Pacific
Source: Copernicus journal article supplement (doi:10.5194/egusphere-2025-1794), 2025-05-06
Supplement: Supplementary file 1 [file Description of supplementary files.docx]

Description of supplementary documents

Supplementary_archive_S1_sequence_alignments.zip – zip archive consisting of all alignments used for the analyses.

Table_S2_distances.xlsx – table of largest distances between sampling stations for MOTUs collected at more than one locality.

Table_S3_scavenging_species_CCZ.docx – List of scavenging amphipod species collected in the CCZ region so far with information about the source of data.
