# Supplementary material for: Hidden behind the scene – high diversity, low connectivity of deep-sea Amphipoda in the polymetallic nodule fields in the Northeast Pacific
Source: Copernicus journal article supplement (doi:10.5194/egusphere-2025-1794), 2025-05-06
Supplement: Supplementary file 3 [file Table_S2_distances.xlsx]

## Sheet: Table_S2
Table S2. Table of largest distances between sampling stations for MOTUs collected at more than one locality.
Family	Final ID	BIN	largest distance
Synopiidae	Syrrhoe sp.	BOLD:AEA9175	1
Synopiidae	Syrrhoites sp.	BOLD:AEB6725	1
Eusiridae	Rhachotropis sp.	BOLD:AEB2575	3
Phoxocephalidae	Leptophoxoides sp.	BOLD:AEB4264	3
Pardaliscidae	Caleidoscopsis sp.	BOLD:AFV6627	3
Pardaliscidae	Pardaliscopsis sp.	BOLD:AEB7076	5
Amphipoda	Amphipoda	BOLD:AEB6325	16
Eusiridae	Rhachotropis sp.	BOLD:AEB6387	16
Oedicerotidae	Bathymedon sp.	BOLD:AEA9456 & BOLD:AGC2705	18
Oedicerotidae	Bathymedon sp. nov.	BOLD:AEA9577	21
Pardaliscidae	Caleidoscopsis sp.	BOLD:AEB7075	43
Synopiidae	Syrrhoe sp.	BOLD:AEA8313	53
Oedicerotidae	Oedicerina teresae	BOLD:AEB1523	58
Phoxocephalidae	Leptophoxus sp.	BOLD:AEB4263	58
Phoxocephalidae	Harpinia sp. nov.	BOLD:AEB4266	58
Stegocephalidae	Andaniexis aff. americana	BOLD:AEB1848	60
Eusiridae	Rhachotropis sp.	BOLD:AEB2578	60
Pardaliscidae	Princaxelia aff. abyssalis	BOLD:AEB6566	60
Synopiidae	Bruzelia sp. nov.	BOLD:AEB6729	60
Pardaliscidae	Pardaliscidae	BOLD:AFU4687	60
Synopiidae	Synopiidae	BOLD:AFV9306	60
Synopiidae	Synopiidae	BOLD:AGD0495	60
Synopiidae	Syrrhoe sp.	BOLD:AGE8590	63
Lysianassoidea	Thrombasia sp. nov.	BOLD:AEB6138	64
Pardaliscidae	Pardaliscidae	BOLD:AFV3807	74
Phoxocephalidae	Harpiniinae	BOLD:AFV7175	77
Pardaliscidae	Pardaliscopsis sp. nov.	BOLD:AEB7072	85
Pardaliscidae	Nicippe sp. nov.	BOLD:AEB7074	85
Pardaliscidae	Halice sp.	BOLD:AFV6626	86
Pardaliscidae	Caleidoscopsis sp.	BOLD:AFV6760	86
Lysianassoidea	Ichnopus pelagicus	BOLD:AEB0008	92
Oedicerotidae	Oedicerotidae	BOLD:AEA8432	99
Synopiidae	Synopiidae	BOLD:AFW3547	102
Phoxocephalidae	Leptophoxus sp.	BOLD:AEB2265	116
Pardaliscidae	Pardaliscidae	BOLD:AGD2823	119
Eusiridae	Cleonardo sp. nov.	BOLD:AEB2179	125
Pardaliscidae	Caleidoscopsis sp.	BOLD:AEB6676	126
Calliopiidae	Oradarea sp. nov.	BOLD:AEB6749	129
Eusiridae	Cleonardo sp. nov.	BOLD:AEA8930	133
Pardaliscidae	Caleidoscopsis sp.	BOLD:AEB7073	133
Pardaliscidae	Pardaliscidae	BOLD:AGD0492	133
Unciolidae	Unciolidae	BOLD:AEB3545	134
Lysianassoidea	Pseudonesimus aff. cedrosianus	BOLD:AEB6403	141
Pardaliscidae	Caleidoscopsis sp. nov.	BOLD:AEB6726	141
Eusiridae	Cleonardo sp.	BOLD:AEB3305	143
Oedicerotidae	Bathymedon sp. nov.	BOLD:AEA9578	144
Ampeliscidae	Byblisoides sp. nov.	BOLD:AEB2414	152
Oedicerotidae	Oedicerotidae	BOLD:AEA8431	164
New family	Fam. nov., gen. nov.	BOLD:AEA8502	164
Eusiridae	Cleonardo sp.	BOLD:AEB2576	165
Phoxocephalidae	Harpiniinae	BOLD:AEB7028	168
Eusiridae	Rhachotropis aff. calceolata	BOLD:AEB2574	186
Synopiidae	Syrrhoe sp. sp. nov.	BOLD:AEA8314	192
Synopiidae	Syrrhoites sp.	BOLD:AEA8728	192
Synopiidae	Syrrhoe sp.	BOLD:AEA8729	192
Oedicerotidae	Oedicerina henrici	BOLD:AEB1524	192
Phoxocephalidae	Leptophoxoides sp.	BOLD:AEB4265	192
Pardaliscidae	Pardaliscoides sp.	BOLD:AEB6677	192
Pardaliscidae	Pardaliscidae	BOLD:AFU4690	192
Lysianassoidea	Lysianassoidea	BOLD:AFV0648	192
New family	Fam. nov., gen. nov.	BOLD:AFV6939	192
Synopiidae	Synopiidae	BOLD:AFX0163	192
Corophioidea	Corophioidea	BOLD:AFU9375	195
Synopiidae	Syrrhoe sp.	BOLD:AEA8605	198
Pardaliscidae	Pardaliscidae	BOLD:AGD2822	198
Eusiridae	Eusirus sp.	BOLD:AEB2206	200
Ampeliscidae	Byblis sp. nov.	BOLD:AEB2413	200
Pardaliscidae	Caleidoscopsis sp.	BOLD:AEB7071	213
Leucothoidae	Leucothoidae	BOLD:AFW6630	219
Eusiridae	Rhachotropis sp. nov.	BOLD:AEB0147	221
Eusiridae	Rhachotropis sp.	BOLD:AEB2930	247
Lysianassoidea	Hippomedon sp. nov.	BOLD:AEB2478	248
Synopiidae	Pseudotiron sp. nov.	BOLD:AEA9176	249
Phoxocephalidae	Leptophoxus sp.	BOLD:AEB3841	249
Pardaliscidae	Pardaliscidae	BOLD:AEA8857	294
Eusiridae	Cleonardo sp.	BOLD:AEB3304	294
Corophioidea	Corophioidea	BOLD:AEA8856	298
Corophioidea	Corophioidea	BOLD:AEB3303	298
Oedicerotidae	Oedicerotidae	BOLD:AFW9723	308
Eusiridae	Rhachotropis sp. nov.	BOLD:AEB2577	988
Synopiidae	Austrosyrrhoe sp. nov.	BOLD:AEB6000	2239
New family	Fam. nov., gen. nov., sp. nov.	BOLD:AEB6828	2239
Oedicerotidae	Bathymedon sp. nov.	BOLD:AEA9579	2292
Oedicerotidae	Oedicerotidae	BOLD:AFW9721	2293
Eusiridae	Cleonardo sp. nov.	BOLD:AEB2180	2377
