# Supplementary material for: Hidden behind the scene – high diversity, low connectivity of deep-sea Amphipoda in the polymetallic nodule fields in the Northeast Pacific
Source: Copernicus journal article supplement (doi:10.5194/egusphere-2025-1794), 2025-05-06
Supplement: Supplementary file 5 [file Table_S3_scavenging_species_CCZ.docx]

Table S3. List of scavenging amphipod species collected in the CCZ region so far with information about the source of data.

| **Family** | **Species** | **Source** |
| --- | --- | --- |
| Alicellidae | *Paralicella caperesca* | Patel et al. 2020, Bribiesca-Contreras  et al. 2021, Mohrbeck et al. 2021 |
| *Paralicella tenuipes* | Patel et al. 2020, Bribiesca-Contreras  et al. 2021, Mohrbeck et al. 2021 |
| *Tectovalopsis* sp. CCZ_229 | Bribiesca-Contreras et al. 2021 |
| *Valettietta* cf. *anacantha* CCZ056C | Bribiesca-Contreras et al. 2021,  Mohrbeck et al. 2021 |
| *Valettietta* cf. *gracilis* | Patel et al. 2020 |
| Cyclocarididae | *Cyclocaris* sp. | Bribiesca-Contreras et al. 2021,  Mohrbeck et al. 2021 |
| Eurytheneidae | *Eurythenes* *magellanicus* | Bribiesca-Contreras et al. 2021,  Mohrbeck et al. 2021 |
| *Eurythenes maldoror* | Bribiesca-Contreras et al. 2021,  Mohrbeck et al. 2021 |
| *Eurythenes sigmiferus* | Patel et al. 2020 |
| *Eurythenes* spp. | Patel et al. 2020 |
| Hirondelleidae | *Hirondellea* sp. | Patel et al. 2020 |
| *Hirondellea* sp. CCZ_224 | Bribiesca-Contreras et al. 2021 |
| *Hirondellea* sp. CCZ_211 | Bribiesca-Contreras et al. 2021 |
| *Hirondellea* sp. CCZ_210 | Bribiesca-Contreras et al. 2021 |
| *Hirondellea* sp. CCZ_014 | Bribiesca-Contreras et al. 2021 |
| Scopelocheiridae | *Paracallisoma* aff. *alberti* | Patel et al. 2020 |
| *Paracallisoma* sp. | Mohrbeck et al. 2021 |
| *Paracallisoma* sp. CCZ_241C1 | Bribiesca-Contreras et al. 2021 |
| Uristidae | *Abyssorchomene chevreuxi* | Bribiesca-Contreras et al. 2021,  Mohrbeck et al. 2021 |
| *Abyssorchomene distinctus* | Patel et al. 2020, Bribiesca-Contreras  et al. 2021, Mohrbeck et al. 2021 |
| *Abyssorchomene gerulicorbis* | Patel et al. 2020, Bribiesca-Contreras  et al. 2021, Mohrbeck et al. 2021 |
| *Abyssorchomene* spp. | Patel et al. 2020 |
| *Stephonyx* sp. CCZ_220 | Bribiesca-Contreras et al 2021 |
