# Supplementary material for: Hidden behind the scene – high diversity, low connectivity of deep-sea Amphipoda in the polymetallic nodule fields in the Northeast Pacific
Source: Copernicus journal article supplement (doi:10.5194/egusphere-2025-1794), 2025-05-06
Supplement: Supplementary file 7 [file Files description.docx]

Alignments used in the analyses divided by family groups.

01_Eusiridae_et_al_COI_align.fasta – alignment of 131 sequences of the families Eusiridae, Leucothoidae, Liljeborgiidae, and Stilipedidae (parvorders Amphilochidira and Eusiridira) and outgroup (*Asellus aquaticus*) used for NJ tree construction and Median Joining Networks preparation.

02_Phox_COI_align.fasta – alignment of 69 sequences of the family Phoxocephalidae and outgroup (*Asellus aquaticus*) used for NJ tree construction and Median Joining Networks preparation.

03_Lysi_Steg_COI_align.fasta – alignment of 65 sequences of the parvorder Lysianassidira) and outgroup (*Asellus aquaticus*) used for NJ tree construction and Median Joining Networks preparation.

04_Oedi_COI_align.fasta – alignment of 51 sequences of the family Oedicerotidae and outgroup (*Asellus aquaticus*) used for NJ tree construction and Median Joining Networks preparation.

05_Pard_Lepe_Melp_COI_align.fasta – alignment of 13 sequences of the families families Pardaliscidae, Lepechinellidae, Melphidippidae and outgroup (*Asellus aquaticus*) used for NJ tree construction and Median Joining Networks preparation.

06_Ampe_Syno_COI_align.fasta – alignment of 87 sequences of the families Synopiidae, Ampeliscidae and outgroup (*Asellus aquaticus*) used for NJ tree construction and Median Joining Networks preparation.

07_rest_COI_align.fasta – alignment of 48 sequences of the families Dulichiidae, Calliopiidae, Hyperiopsidae, Unciolidae, Mirabestidae fam. nov. and unidentified taxa and outgroup (*Asellus aquaticus*) used for NJ tree construction and Median Joining Networks preparation.

08_CCZ_COI_all_align_ASAP.fasta – alignment of all 581 sequences used for ASAP analysis.
