# Supplementary material for: Hidden behind the scene – high diversity, low connectivity of deep-sea Amphipoda in the polymetallic nodule fields in the Northeast Pacific
Source: Copernicus journal article supplement (doi:10.5194/egusphere-2025-1794), 2025-05-06
Supplement: Supplementary file [file egusphere-2025-1794-RC1-supplement.pdf]

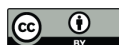

**1 Hidden behind the scene – high diversity, low connectivity of deep-sea Amphipoda in the**  
**2 polymetallic nodule fields in the central East Pacific**

3 Anna M. Jażdżewska<sup>1</sup>, Karolina Biniek<sup>1</sup>, Pedro Martínez Arbizu<sup>2</sup>, Annemiek Vink<sup>3</sup>

4 <sup>1</sup>Department of Invertebrate Zoology and Hydrobiology, Faculty of Biology and Environmental  
5 Protection, University of Lodz, 12/16 Banacha st., 90–237 Lodz, Poland,

6 <sup>2</sup>Senckenberg am Meer, ~~Department~~ German Center for Marine Biodiversity Research (DZMB),  
7 Südstrand 44, D-26382 Wilhelmshaven, Germany

8 <sup>3</sup>Federal Institute for Geosciences and Natural Resources, Marine Geology, 30655, Hannover, Germany

9 **Corresponding author:** Anna Jażdżewska (anna.jazdzewska@biol.uni.lodz.pl)

10 AMJ ORCID: 0000-0003-2529-0641

11 KB ORCID: 0009-0007-2984-9322

12 PMA ORCID: 0000-0002-0891-1154

13 AV ORCID: 0000-0002-5178-9721

14  
15 **Keywords**

16 Clarion-Clipperton Zone, abyssal, DNA barcoding, species richness, species distribution, deep-  
17 sea mining

18  
19 **ABSTRACT**

20 The Clarion-Clipperton Zone (CCZ) situated in the central east Pacific holds major portions of  
21 manganese nodule deposits and is therefore subject to intense exploration for future deep-sea  
22 mining. However, mining ~~raises~~ multiple concerns. Among others about its direct or indirect  
23 impact on abyssal environment. ~~The more~~, proper evaluation of deep-sea protection plans to be  
24 applied there is still hindered by insufficient knowledge of ~~the~~ abyssal fauna diversity and their  
25 assemblages.

26 Amphipoda are speciose and abundant in all marine habitats and were proven to be important  
27 food source for higher trophic levels. These crustaceans are brooders with no planktonic larval  
28 stage, so migration of species depend only on swimming capacities of adult animals. In the CCZ  
29 macrofauna-sized and relatively mobile, epibenthic Amphipoda, not collected with commonly  
30 used box corers or multicorers, remained unstudied. The present work aims to fill ~~in~~ this gap in  
31 knowledge by: 1) characterizing the diversity of amphipods across the CCZ and one Area of



Particular Environmental Interest (APEI), 2) studying the amphipod species distribution and assemblages as well as 3) inferring the connectivity between eastern and western parts of the CCZ and other deep-sea regions.

The material was collected with epibenthic sledge from three contractor zones (UK, Singapore, Germany) and from APEI-06. Specimens were sorted into families and preferably morphospecies and subjected to cytochrome *c* oxidase subunit I gene (COI) barcoding.

Within total of 708 individuals 23 known and one undescribed families were identified. The barcoding allowed to obtain 581 sequences that were ascribed to 207 Molecular Operational Taxonomic Units (MOTUs). The families that dominated barcoded material in terms of abundance and species richness were: Pardaliscidae (123 ind., 44 MOTUs), Eusiridae (122 ind., 32 MOTUs) and Synopiidae (74 ind., 31 MOTUs). Only 17 known species were identified; another 48 are considered as new to science. Almost 70% of MOTUs were singletons or doubletons and 186 MOTUs were unique for the present study. The remaining 21 taxa appeared to be broadly distributed. Among the MOTUs recorded only in the CCZ majority was distributed within 400 km distance. Just six species reached or exceeded 1000 km distance of occurrence.

Additionally only one species was shared between contractor areas and the studied APEI that was supposed to be preserved area representative for the mining zones. The cluster analysis of the fauna collected during three expeditions to the German contractor areas revealed almost no similarity between the West and East part of the CCZ. Additionally, within the eastern part of the studied region geographic proximity appeared to have no influence on station clustering.

The study confirmed low abundance and high species richness of deep-sea amphipod fauna of the CCZ and their highly variable assemblages. Moreover, it has shown weak connectivity between eastern and western parts of the region as well as between the contractor zones, APEIs and other deep-sea regions of the World. All the above suggest high vulnerability of the assemblages studied and, with the present state of knowledge, weak representativeness of Areas of Particular Environmental Interest for the mining zones. In order to better understand the deep-sea biodiversity and develop Regional Environmental Management Plans for the whole CCZ area two main recommendations are to be made: 1) to conduct more intensive sampling program of APEIs parallel to monitoring studies of contractor zones with the goal to better assess their usefulness as reservoirs of biodiversity for the mining areas, 2) to include the epibenthic sledge

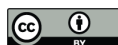

62 among standard gears used for sampling in order to avoid missing important part of deep-sea  
63 fauna in the monitoring studies.

64

## 65 1 INTRODUCTION

66 The development of high- and green-tech technologies requires growing amount of rare-earth-  
67 element metals (Hein et al., 2013). Being finite resource with on-land deposits often limited or  
68 not accessible (McLellan et al., 2016) alternative sources of such elements have been  
69 investigated. The Clarion-Clipperton Zone (CCZ) situated between the Clarion and the  
70 Clipperton Fracture Zones in the central east Pacific and covering approximately 6 million km<sup>2</sup>  
71 (Wiklund et al., 2019) holds major portions of manganese nodule deposits and is therefore  
72 subject to intense exploration for future deep-sea mining activities (ISA, 2010). At present, the  
73 International Seabed Authority (ISA) has issued nineteen nodule exploration licenses within the  
74 CCZ (<https://www.isa.org.jm/exploration-contracts/polymetallic-nodules/>). Promising from the  
75 industry point of view, the deep-sea mining rises multiple concerns including technical,  
76 environmental, financial, and legal issues (IISD, 2019). The impact on the deep-sea environment  
77 may be direct (the removal of nodules, and the destruction of the seabed during nodules  
78 collection) or indirect (the generation of sediment plumes, the discharge of mine tailings)  
79 (Rolinski et al., 2001; Sharma et al., 2001; Washburn et al., 2021b) and has already been proved  
80 as having serious consequences on the deep-sea communities (Jones et al., 2017; Miljutin et al.,  
81 2011; Lefaible et al. 2023; 2024). To reduce the concerns about the irreversible impact of deep-  
82 sea mining activities the conservation planning has been conducted and resulted in CCZ-  
83 Environmental Management Plan (CCZ-EMP) (ISA 2012). One of the achievements of that plan  
84 was the establishment of the network of nine, Areas of Particular Environmental Interest (APEI)  
85 (ISA, 2012) that was later updated by addition of four new APEIs in 2021 (ISA, 2021) (Fig. 1).

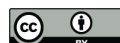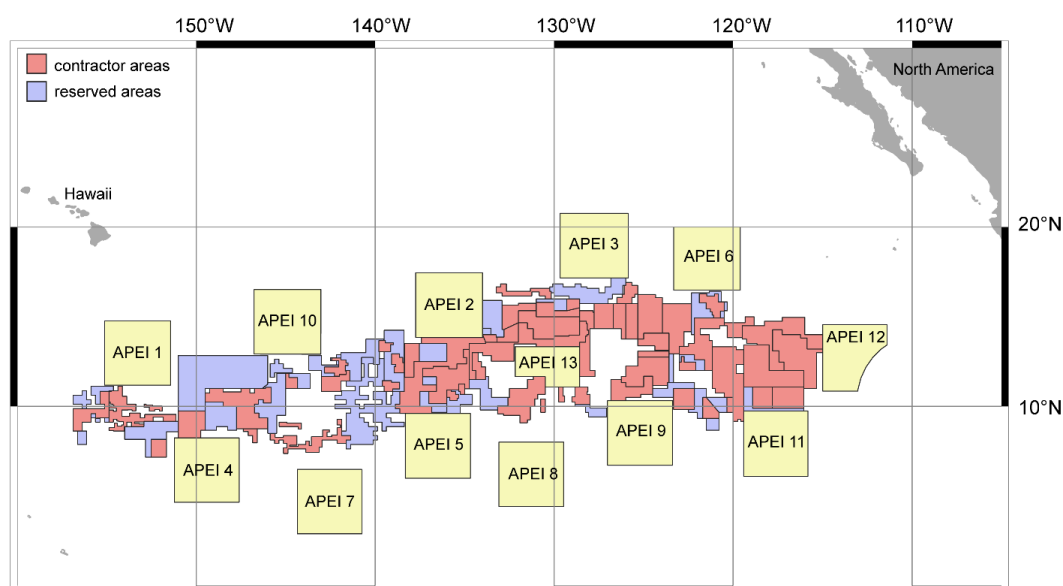

Figure 1. Exploration contract areas for polymetallic nodules in the Clarion-Clipperton Zone, central equatorial Pacific basin, APEI – Area of Particular Environmental Interest.

However, all but one APEIs are situated outside the main area prospected for deep-sea mining and initial studies suggested that the present network of APEIs may not sufficiently reflect environmental conditions as well as faunal communities of the mining zones (Błażewicz et al., 2019; McQuaid et al., 2020; Washburn et al., 2021a, b; Uhlenkott et al., 2023). The more, almost half of the protected areas lack any biodiversity information (see Fig. 1 in Rabone et al., 2023). Among further challenges associated with proper evaluation of deep-sea protection plans is still insufficient knowledge of the abyssal fauna diversity and their assemblages (e.g. Washburn et al., 2021b; Uhlenkott et al., 2023). Numerous studies have been conducted for megafauna (available to be studied also with the use of underwater camera allowing to screen larger parts of the ocean seafloor) (e.g. Uhlenkott et al., 2023) or scavengers easily collected in large numbers with baited traps (e.g. Patel et al., 2020; Bribiesca-Contreras et al., 2021; Mohrbeck et al., 2021). Also meiofauna that is traditionally sampled with multi-corers (MUC) is well represented in the studies of CCZ assemblages (e.g. Hauquier et al., 2019; Tong et al., 2022; Lefaible et al., 2024) as is also the case for sediment dwelling, less mobile macrofaunal taxa like Polychaeta or Tanaidacea collected with box cores (e.g. De Smet et al., 2017; Błażewicz et al., 2019; Pasotti et



105 al., 2021; Washburn et al., 2021b). In contrary, moderately large (macrofauna-sized) and  
106 relatively mobile, epibenthic animals, like representatives of the crustacean order Amphipoda, are  
107 often not well represented in such studies. They are too small to be recorded with underwater  
108 camera, too large to be collected with MUC and too fast or swept away during sampling with box  
109 corer. Nevertheless, when sampled with gear designed to collect epi- and suprabenthic taxa,  
110 namely epibenthic sledge (EBS), amphipods appear to constitute diverse and sometimes abundant  
111 component of deep-sea macrofaunal communities (Frutos et al., 2017; Brandt et al., 2025) so they  
112 deserve profound studies.

113 Amphipoda represented in the present moment by 10,740 described species (Horton et al.,  
114 2025a), are speciose and abundant in all marine habitats from coastal waters till the deepest  
115 trenches. In the deep sea amphipod diversity and abundance is known to be high in the bathyal,  
116 decreasing towards abyssal and hadal depths where they are surpassed in diversity by another  
117 order, the Isopoda (e.g. Frutos et al., 2017; Jamieson et al. 2011). Amphipods, belonging to the  
118 superorder Peracarida, are brooders with no planktonic larval stage, so migration of species  
119 depend only on swimming capacities of adult animals. The order comprises truly pelagic species  
120 (mainly representatives of the suborder Hyperiidea) but the majority of amphipods are associated  
121 with benthic realm living either in the sediment or ~~being the~~ part of suprabenthic communities  
122 (Lowry and Myers, 2017; Brix et al., 2018). The crustaceans of this group were also proven to be  
123 important food source for higher trophic levels (Dauby et al., 200; Preciado et al., 2017).

124 Since the proposal of the DNA barcoding concept by Hebert et al., (2003) the use of molecular  
125 methods in species recognition has become broadly applied and often supplements morphological  
126 taxonomy (e.g. Hubert and Hanner, 2015; Seefeldt et al., 2017). Within marine and deep sea  
127 Peracarida this technique, when associated with morphological studies, often revealed hidden  
128 diversity, including the recognition of cryptic or pseudocryptic species (e.g. Bober et al., 2018;  
129 Havermans, 2016; Verheye et al., 2016).

130 The studies of Amphipoda in the CCZ conducted by ~~now~~ concerned mainly the scavengers and  
131 gave insights into the diversity and molecular connectivity of representatives of this trophic guild  
132 including confirmation of cosmopolitan distribution of some species (e.g. Patel et al., 2020;  
133 Bribiesca-Contreras et al., 2021; Jażdżewska et al., 2021; Mohrbeck et al., 2021). Contrariwise,  
134 the non-scavenging amphipods were never studied in details.

135 The present study aims to:



- 136 - characterize the morphological and molecular diversity of Amphipoda across three contractor  
137 zones of CCZ and one ~~Area of Particular Environmental Interest~~.  
138 - study the amphipod species distribution and assemblages in the area,  
139 - infer the connectivity between eastern and western part of the CCZ as well as with other deep-  
140 sea regions.

141 As such the research fills in the gap in knowledge of important part of the abyssal communities  
142 and brings insights into monitoring and protection plans of the zone prospected for deep-sea  
143 mining.

144

## 145 **2 MATERIAL AND METHODS**

146 The material for present study was collected during five scientific deep-sea cruises (Fig. 2, Table  
147 1). The ABYSSLINE-1 (ABYSSal baseLINE project) expedition, on board the R/V *Melville*, was  
148 conducted in 2013 (Smith et al., 2013), while the ABYSSLINE-2 (ABYSSal baseLINE project)  
149 expedition, on board the R/V *Thompson*, in 2015 (Smith et al., 2015) and collected samples from  
150 the UKSR License Area (UK Seabed Resources Ltd, United Kingdom), OMS License Area  
151 (Ocean Mineral Singapore Pte. Ltd.) as well as from APEI-06. The other three expeditions,  
152 MANGAN 2016, MANGAN 2018 and MANGAN 2023 sampled the German License Area  
153 (BGR—Bundesanstalt für Geowissenschaften und Rohstoffe) on board the R/V *Kilo Moana*  
154 (MANGAN 2016 and 2023) and R/V *Sonne* (MANGAN 2018) (Rühlemann et al., 2017, 2023;  
155 Rühlemann, 2018).

156

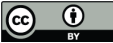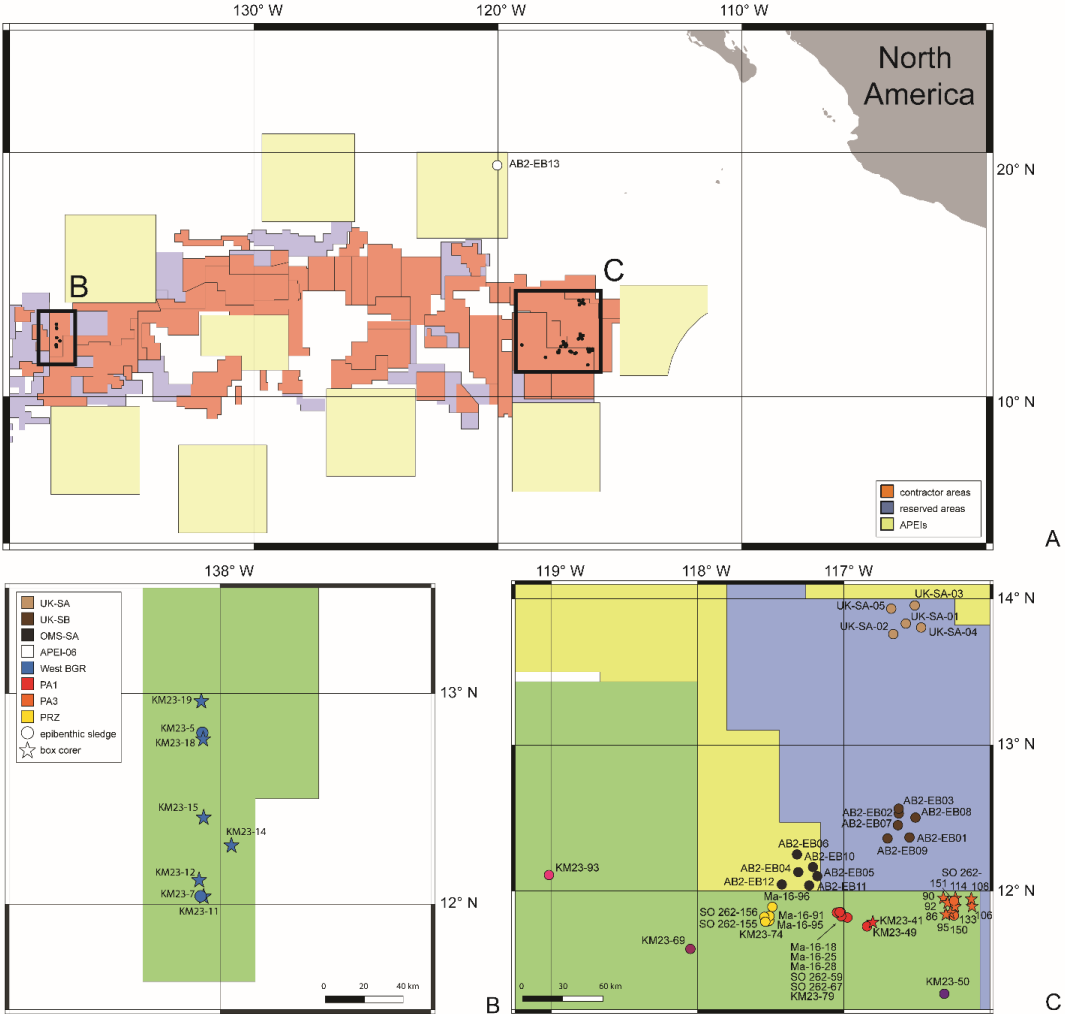

Figure 2. Localization of sampling stations. A – general view of the study area with indication of the locality of station from APEI-06 (APEI – Area of Particular Environmental Interest), B – close up of the West BGR area, C – close up of the eastern part of CCZ (East BGR, OMS and UKSR contractor areas).

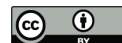

Table 1. Station data including sampling gear information (EBS – epibenthic sledge, BC – box corer), total number of individuals collected, the number of individuals used for barcoding as well as number of sequences obtained. NA – no data available.

| Station     | Area                 | Latitude (N)              | Longitude (W)               | Depth [m] | Collection date | Gear | Total no of ind. | No of ind. for barcoding | No of seq. obtained | Sequencing success | Notes                                                                                                                                 |
|-------------|----------------------|---------------------------|-----------------------------|-----------|-----------------|------|------------------|--------------------------|---------------------|--------------------|---------------------------------------------------------------------------------------------------------------------------------------|
| ABYSSLINE-1 |                      |                           |                             |           |                 |      |                  |                          |                     |                    |                                                                                                                                       |
| UK-SA-01    | UKSR (UK1-Stratum A) | 13° 49.86'                | 116° 34.5'                  | 4597      | 09-Oct-2013     | EBS  | NA               | 18                       | 6                   | 33                 | No information about the total abundance of Amphipoda in the sample available, no vouchers available, not used for diversity studies. |
| UK-SA-02    | UKSR (UK1-Stratum A) | 13° 45.54'                | 116° 39.66'                 | 4070      | 12-Oct-2013     | EBS  | NA               | 2                        | 2                   | 100                |                                                                                                                                       |
| UK-SA-03    | UKSR (UK1-Stratum A) | 13° 57.3'                 | 116° 30.84'                 | 4143      | 13-Oct-2013     | EBS  | NA               | 2                        | 1                   | 50                 |                                                                                                                                       |
| UK-SA-04    | UKSR (UK1-Stratum A) | 13° 48.24'                | 116° 28.2'                  | 4128      | 17-Oct-2013     | EBS  | NA               | 25                       | 11                  | 44                 |                                                                                                                                       |
| UK-SA-05    | UKSR (UK1-Stratum A) | 13° 55.98'                | 116° 40.5'                  | 4196      | 19-Oct-2013     | EBS  | NA               | 5                        | 3                   | 60                 |                                                                                                                                       |
| ABYSSLINE-2 |                      |                           |                             |           |                 |      |                  |                          |                     |                    |                                                                                                                                       |
| AB2-EB01    | UKSR (UK1-Stratum B) | 12° 22.02'                | 116° 33'                    | 4209      | 18-Feb-2015     | EBS  | NA               | 7                        | 6                   | 86                 | No information about the total abundance of Amphipoda in the sample available, not used for diversity studies.                        |
| AB2-EB02    | UKSR (UK1-Stratum B) | 12° 31.86'                | 116° 37.38'                 | 4219      | 20-Feb-2015     | EBS  | NA               | 7                        | 5                   | 71                 |                                                                                                                                       |
| AB2-EB03    | UKSR (UK1-Stratum B) | 12° 33.78'                | 116° 37.5'                  | 4219      | 23-Feb-2015     | EBS  | NA               | 7                        | 7                   | 100                |                                                                                                                                       |
| AB2-EB04    | OMS (OMS-Stratum A)  | 12° 7.8'                  | 117° 18.66'                 | 4111      | 25-Feb-2015     | EBS  | NA               | 7                        | 6                   | 86                 |                                                                                                                                       |
| AB2-EB05    | OMS (OMS-Stratum A)  | 12° 6.12'                 | 117° 10.86'                 | 4100      | 26-Feb-2015     | EBS  | NA               | 7                        | 5                   | 71                 |                                                                                                                                       |
| AB2-EB06    | OMS (OMS-Stratum A)  | 12° 15.06'                | 117° 19.2'                  | 4137      | 01-Mar-2015     | EBS  | NA               | 7                        | 7                   | 100                |                                                                                                                                       |
| AB2-EB07    | UKSR (UK1-Stratum B) | 12° 27.06'                | 116° 37.8'                  | 4145      | 02-Mar-2015     | EBS  | NA               | 7                        | 1                   | 14                 |                                                                                                                                       |
| AB2-EB08    | UKSR (UK1-Stratum B) | 12° 30.18'                | 116° 30.54'                 | 4244      | 04-Mar-2015     | EBS  | NA               | 7                        | 2                   | 29                 |                                                                                                                                       |
| AB2-EB09    | UKSR (UK1-Stratum B) | 12° 21.6'                 | 116° 42'                    | 4170      | 10-Mar-2015     | EBS  | NA               | 8                        | 5                   | 62                 |                                                                                                                                       |
| AB2-EB10    | OMS (OMS-Stratum A)  | 12° 9.84'                 | 117° 12.66'                 | 4047      | 11-Mar-2015     | EBS  | NA               | 8                        | 2                   | 25                 |                                                                                                                                       |
| AB2-EB11    | OMS (OMS-Stratum A)  | 12° 2.28'                 | 117° 14.22'                 | 4097      | 14-Mar-2015     | EBS  | NA               | 8                        | 4                   | 50                 |                                                                                                                                       |
| AB2-EB12    | OMS (OMS-Stratum A)  | 12° 2.7'                  | 117° 25.44'                 | 4223      | 16-Mar-2015     | EBS  | NA               | 8                        | 7                   | 87                 |                                                                                                                                       |
| AB2-EB13    | APEI-06              | 19° 27.9'                 | 120° 1.5'                   | 4026      | 20-Mar-2015     | EBS  | NA               | 8                        | 6                   | 75                 |                                                                                                                                       |
| MANGAN 2016 |                      |                           |                             |           |                 |      |                  |                          |                     |                    |                                                                                                                                       |
| Ma-16-18    | BGR-PA1              | 11° 51.372' - 11° 51.662' | 117° 01.535' - 117° 00.482' | 4132-4123 | 28-Apr-2016     | EBS  | 8                | 8                        | 8                   | 100                |                                                                                                                                       |
| Ma-16-25    | BGR-PA1              | 11° 49.143' - 11° 49.975' | 116° 58.492' - 116° 57.797' | 4107-4101 | 29-Apr-2016     | EBS  | 15               | 15                       | 15                  | 100                |                                                                                                                                       |
| Ma-16-28    | BGR-PA1              | 11° 49.654' - 11° 49.902' | 117° 00.299' - 116° 59.174' | 4143-4133 | 01-May-2016     | EBS  | 11               | 11                       | 11                  | 100                |                                                                                                                                       |
| Ma-16-91    | BGR-PRZ              | 11° 49.792' - 11° 49.842' | 117° 30.458' - 117° 29.208' | 4344-4344 | 09-May-2016     | EBS  | 24               | 24                       | 22                  | 92                 |                                                                                                                                       |

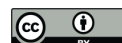

|                    |                  |                              |                                |               |             |                   |     |    |    |     |                                                                                           |
|--------------------|------------------|------------------------------|--------------------------------|---------------|-------------|-------------------|-----|----|----|-----|-------------------------------------------------------------------------------------------|
| Ma-16-95           | BGR-PRZ          | 11° 47.862' -<br>11° 47.152' | 117° 30.639' -<br>117° 29.490' | 4356-<br>4359 | 09-May-2016 | EBS               | 28  | 26 | 24 | 86  | 2 badly damaged<br>individuals not<br>used for barcoding                                  |
| Ma-16-96           | BGR-PRZ          | 11° 53.492' -<br>11° 53.791' | 117° 29.357' -<br>117° 28.209' | 4193-<br>4256 | 10-May-2016 | EBS               | 6   | 6  | 5  | 83  |                                                                                           |
| <b>MANGAN 2018</b> |                  |                              |                                |               |             |                   |     |    |    |     |                                                                                           |
| SO 262-59          | BGR-PA1          | 11° 49.720' -<br>11° 50.055' | 117° 01.080' -<br>116° 59.530' | 4097-<br>4128 | 22-Apr-2018 | EBS               | 10  | 10 | 10 | 100 |                                                                                           |
| SO 262-67          | BGR-PA1          | 11° 51.190' -<br>11° 51.621' | 117° 02.830' -<br>117° 00.804' | 4131-<br>4131 | 24-Apr-2018 | EBS               | 6   | 6  | 5  | 83  |                                                                                           |
| SO 262-150         | BGR-PA3          | 11° 50.009' -<br>11° 49.978' | 116° 14.780' -<br>116° 13.316' | 4074-<br>4095 | 07-May-2018 | EBS               | 28  | 27 | 26 | 96  | 1 ind. of<br>Hyperideae not<br>used for barcoding                                         |
| SO 262-151         | BGR-PA3          | 11° 55.986' -<br>11° 55.992' | 116° 14.706' -<br>116° 13.320' | 4150-<br>4151 | 08-May-2018 | EBS               | 5   | 5  | 5  | 100 |                                                                                           |
| SO 262-155         | BGR-PRZ          | 11° 47.436' -<br>11° 47.677' | 117° 32.213' -<br>117° 30.910' | 4352-<br>4351 | 09-May-2018 | EBS               | 46  | 45 | 39 | 87  | 1 ind. of<br>Hyperideae not<br>used for barcoding                                         |
| SO 262-156         | BGR-PRZ          | 11° 49.381' -<br>11° 49.752' | 117° 32.663' -<br>117° 30.760' | 4340-<br>4340 | 09-May-2018 | EBS               | 23  | 22 | 21 | 95  | 1 ind. of<br>Hyperideae not<br>used for barcoding                                         |
| SO 262-86          | BGR-PA3          | 11° 50.584'                  | 116° 17.514'                   | 4181          | 29-Apr-2018 | BC, 0-3 cm layer  | 1   | 1  | 1  | 100 |                                                                                           |
| SO 262-90          | BGR-PA3          | 11° 57.039'                  | 116° 19.096'                   | 4157          | 29-Apr-2018 | BC, 0-3 cm layer  | 2   | 2  | 1  | 50  |                                                                                           |
| SO 262-92          | BGR-PA3          | 11° 55.449'                  | 116° 17.439'                   | 4172          | 30-Apr-2018 | BC, 0-3 cm layer  | 2   | 2  | 2  | 100 |                                                                                           |
| SO 262-95          | BGR-PA3          | 11° 50.636'                  | 116° 16.112'                   | 4165          | 30-Apr-2018 | BC, 0-3 cm layer  | 1   | 1  | 1  | 100 |                                                                                           |
| SO 262-106         | BGR-PA3          | 11° 53.825'                  | 116° 07.305'                   | 4171          | 02-May-2018 | BC, 3-5 cm layer  | 1   | 1  | 1  | 100 |                                                                                           |
| SO 262-108         | BGR-PA3          | 11° 56.986'                  | 116° 07.628'                   | 4207          | 02-May-2018 | BC, 0-3 cm layer  | 1   | 1  | 1  | 100 |                                                                                           |
| SO 262-114         | BGR-PA3          | 11° 57.017'                  | 116° 14.157'                   | 4175          | 03-May-2018 | BC, 0-3 cm layer  | 1   | 1  | 1  | 100 |                                                                                           |
| SO 262-133         | BGR-PA3          | 11° 53.833'                  | 116° 14.262'                   | 4107          | 05-May-2018 | BC, surface water | 1   | 1  | 1  | 100 |                                                                                           |
| <b>MANGAN 2023</b> |                  |                              |                                |               |             |                   |     |    |    |     |                                                                                           |
| KM23-5             | West BGR         | 12°48.7751' -<br>12°50.0513' | 138°05.043' -<br>138°05.1315'  | 4996-<br>5020 | 16-Apr-2023 | EBS               | 14  | 14 | 14 | 100 |                                                                                           |
| KM23-7             | West BGR         | 12°02.2976' -<br>12°03.5888' | 138°05.4932' -<br>138°05.7092' | 5109-<br>5139 | 17-Apr-2023 | EBS               | 30  | 29 | 24 | 83  | Additional 1 badly<br>damaged<br>individual of<br>Oedicerotidae not<br>used for barcoding |
| KM23-49            | BGR WA3<br>(PA1) | 11°45.4904' -<br>11°46.3035' | 116°50.4565' -<br>116°49.3268' | 4150-<br>4173 | 30-Apr-2023 | EBS               | 52  | 51 | 37 | 72  | 1 ind. of<br>Hyperideae not<br>used for barcoding                                         |
| KM23-50            | BGR WA4          | 11°17.7919' -<br>11°18.5445' | 116°18.8626' -<br>116°17.6747' | 4185-<br>4182 | 01-May-2023 | EBS               | 111 | 99 | 78 | 79  | 11 ind. of<br>Hyperideae and 1<br>ind. of<br>Oxycephalidae?<br>not used for<br>barcoding  |
| KM23-69            | BGR WA5          | 11°36.252' -<br>11°37.1050'  | 118°02.981' -<br>118°01.2511'  | 4368-<br>4356 | 04-May-2023 | EBS               | 83  | 83 | 77 | 93  |                                                                                           |
| KM23-74            | BGR WA6<br>(PRZ) | 11°47.6444' -<br>11°48.0414' | 117°30.9650' -<br>117°29.5413' | 4360-<br>4364 | 06-May-2023 | EBS               | 26  | 24 | 24 | 100 | 2 ind. of<br>Hyperideae not<br>used for barcoding                                         |
| KM23-79            | BGR WA2<br>(PA1) | 11°51.3560' -<br>11°51.7516' | 117°01.2662' -<br>116°59.8924' | 4126-<br>4128 | 07-May-2023 | EBS               | 16  | 16 | 14 | 87  |                                                                                           |
| KM23-93            | BGR WA7          | 12°06.612' -<br>12°07.3536'  | 119°01.072' -<br>118°59.8503'  | 4381-<br>4430 | 10-May-2023 | EBS               | 16  | 16 | 15 | 94  |                                                                                           |
| KM23-11            | West BGR         | 12°02.298'                   | 138°05.423'                    | 5105          | 18-Apr-2023 | BC                | 6   | 6  | 6  | 100 |                                                                                           |
| KM23-12            | West BGR         | 12°06.8609'                  | 138°06.0754'                   | 5173          | 19-Apr-2023 | BC                | 1   | 1  | 1  | 100 |                                                                                           |
| KM23-14            | West BGR         | 12°16.6825'                  | 137°56.7545'                   | 4976          | 19-Apr-2023 | BC                | 1   | 0  | x  | x   | 1 ind. of<br>Hyperideae not<br>used for barcoding                                         |

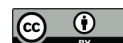

|         |                  |             |              |      |             |    |   |   |   |     |                                                   |
|---------|------------------|-------------|--------------|------|-------------|----|---|---|---|-----|---------------------------------------------------|
| KM23-15 | West BGR         | 12°24.5724' | 138°04.6848' | 5033 | 19-Apr-2023 | BC | 2 | 0 | x | x   | 2 ind. of<br>Hyperiidea not<br>used for barcoding |
| KM23-18 | West BGR         | 12°47.3146' | 138°04.8688' | 4940 | 20-Apr-2023 | BC | 2 | 1 | 1 | 100 | 1 ind. of<br>Hyperiidea not<br>used for barcoding |
| KM23-19 | West BGR         | 12°57.7304' | 138°05.3714' | 5009 | 20-Apr-2023 | BC | 2 | 2 | 2 | 100 |                                                   |
| KM23-41 | BGR WA3<br>(PA1) | 11°47.1427' | 116°48.0835' | 4169 | 29-Apr-2023 | BC | 3 | 3 | 2 | 67  |                                                   |

169

## 170 2.1 Sample collection and processing

171 The samples were collected using a Brenke-type epibenthic sledge (EBS, Brandt and Barthel,  
172 1995; Brenke, 2005). The deployment protocol followed Brenke (2005). Upon recovery, samples  
173 were passed through 300 µm and either sorted out immediately and preserved in 80% ethanol  
174 kept at -20°C, or immediately transferred into chilled (-20°C) 96% ethanol. In the second case,  
175 the sorting by stereomicroscope was carried out after 48 h storage in a -20°C freezer (Riehl et al.,  
176 2014). A few individuals collected with box corer during MANGAN 2018 and MANGAN 2023  
177 expeditions were added.

178

## 179 2.2 Morphological study

180 From ABYSSLINE-1 collection only a set of sequences was available, in case of ABYSSLINE-2  
181 a representation of amphipods (6-7 per station) was given to the authors of the study. In contrast  
182 all individuals collected with EBS during MANGAN 2016, 2018 and 2023 were studied.  
183 Specimens were initially examined using a Leica M125 stereomicroscope, sorted into families  
184 and preferably morphospecies (groups that form phenotypic clusters without overlap between  
185 them) and later subjected to cytochrome *c* oxidase subunit I gene (COI) barcoding (details given  
186 below). Present analysis considers only non-pelagic species even though the latter are  
187 occasionally retrieved using EBS. As a result, the representatives of the suborder Hyperiidea,  
188 even if sometimes recorded in the samples were not studied further. After specification of the  
189 Molecular Operational Taxonomic Units (MOTUs) representatives of each of them were again  
190 studied morphologically (in certain cases including preparation of microscopic slides) to provide  
191 as detailed taxonomic identification as possible. The taxa from amphipod suborders other than  
192 Hyperiidea that only after the barcoding appeared to belong to pelagic taxa were excluded  
193 (although their barcodes were used for delimitation of taxa and are published).

194

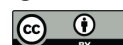

## 2.3 Molecular investigation

All individuals that possessed at least head were used for the total genomic DNA extraction. The extraction was made from one pleopod (if the posterior part of the body was missing the last remaining leg).

The DNA extraction of individuals collected during all expeditions apart from MANGAN 2023 was performed using 100 µl InstaGene Matrix (BIO-RAD). Digestion was carried out at 56°C for 40 min. The extraction of DNA from individuals from MANGAN 2023 was carried out using a mixture of 112,5 µl pure H<sub>2</sub>O with 0.011 g Chelex (Sigma-Aldrich Co.) and 7,5 µl proteinase K. The digestion at 55 °C lasted for 6 h.

The DNA barcoding fragment of COI (658 bp) was amplified using universal LCO1490 (GGTCAACAAATCATAAAGATATTGG) and HCO2198 (TAAACTTCAGGGTGACCAAAAAATCA) primer pair (Folmer et al., 1994; collection from ABYSSLINE-1) or the degenerate LCO1490-JJ (CHACWAAYCATAAAGATATYGG) and HCO2198-JJ (AWACTTCVGGRTGVCCAAARAATCA) primer pair (Astrin and Stüben, 2008; collections from ABYSSLINE-2, MANGAN 2016, MANGAN 2018). The polymerase chain reaction was performed with AccuStart II PCR SuperMix (Quantabio) and the reaction conditions following Hou et al. (2007) (Table 2). Sequencing was done bi-directionally in MacroGen Inc. (the Netherlands) on an Applied Biosystems 3730xl capillary sequencer. Electropherograms were viewed in Geneious 10.2.6 and primer sequences and ambiguous positions were trimmed.

The COI barcodes of Amphipoda from MANGAN 2023 were obtained with Oxford Nanopore Technologies sequencing (ONT). The marker was amplified using a primer mix containing LCO1490-JJ and HCO2198-JJ primers and a tagging sequence specific to each sample, which consisted of a 9 nt (Srivathsan et al., 2023). Samples were amplified in batches, in sets consisting of three 96-well plates. Each sample consisted of 6.5 µl of Dream Taq PCR Mastermix (Thermo Scientific), 2µl of primers mix, 1 µl of matrix DNA and 3.5 µl of H<sub>2</sub>O to reach 13 µl of final volume. The PCR conditions were modified from Hou et al. 2007 (Table 2).

221

222 Table 2. PCR conditions.

| Step                 | For Sanger sequencing<br>(Hou et al. 2007) |             |                 | For ONT sequencing<br>(Hou et al. 2007 modified) |             |                 |
|----------------------|--------------------------------------------|-------------|-----------------|--------------------------------------------------|-------------|-----------------|
|                      | Temp<br>[°C]                               | Time<br>[s] | No of<br>cycles | Temp<br>[°C]                                     | Time<br>[s] | No of<br>cycles |
| Initial denaturation | 95                                         | 300         |                 | 95                                               | 300         |                 |



|                 |    |     |    |    |     |    |
|-----------------|----|-----|----|----|-----|----|
| Denaturation    | 95 | 30  | 5  | 95 | 50  | 5  |
| Annealing       | 45 | 90  |    | 45 | 50  |    |
| Extension       | 72 | 60  |    | 72 | 60  |    |
| Denaturation    | 95 | 30  | 35 | 95 | 50  | 35 |
| Annealing       | 51 | 90  |    | 51 | 50  |    |
| Extension       | 72 | 60  |    | 72 | 60  |    |
| Final extension | 72 | 300 |    | 72 | 120 |    |

223

224 Amplicons in a volume of 5 µl each were pooled and purified according to the Sera-Mag  
 225 protocol. ~~In the next step, concentration of DNA in the sample using a Qubit 4 fluorometer (Thermo~~  
 226 ~~Fisher Scientific) was measured and the Qubit dsDNA BR Assay Kit reagent (Thermo Fisher~~  
 227 ~~Scientific).~~ Purified DNA was stored at -20°C until the next steps were initiated. Sequencing was  
 228 performed according to the Ligation Sequencing Amplicons V14 (SQK-LSK114) protocol (Oxford  
 229 Nanopore Sequencing 2024). The procedure included editing the ends of barcode sequences,  
 230 attaching an adapter protein, and loading and running the reaction plate (Flongle). Sequencing took  
 231 about 24 hours.

232 The obtained data were then subjected to a decoding process (basecallig). This step involves  
 233 assigning voltage changes to the corresponding nucleotides to obtain a complete sequence (Wang  
 234 et al., 2021). It was followed by demultiplexing using the ONTbarcoder tool. This process involves  
 235 assigning the obtained sequences to a specific sample based on the tagging sequences used earlier.  
 236 In addition, ONTbarcoder evaluates the quality of the obtained reads, creating a consensus barcode  
 237 sequence (Srivathsan et al., 2021).

238 Sequences were blasted using default parameters on NCBI BLASTn and translated into amino  
 239 acid sequences to confirm that no stop codons were present. All sequences were deposited in  
 240 GenBank with the accession numbers: PQ734211 – PQ734784. Relevant voucher information,  
 241 taxonomic classifications and sequences are deposited in the data set “DS-AMPHICZ” in the  
 242 Barcode of Life Data System (BOLD) (dx.doi.org/10.5883/DS-AMPHICZ)  
 243 (www.boldsystems.org) (Ratnasingham and Hebert, 2007).

244 All sequences were aligned with the MAFFT v.7.308 algorithm (Katoh et al., 2002; Katoh and  
 245 Standley, 2013) in Geneious 10.2.6, resulting in a 614 bp alignment and subsequently three  
 246 molecular species delimitation methods were applied to reveal the Molecular Operational  
 247 Taxonomic Units (MOTUs). Two methods were distance-based: Barcode Index Number (BIN)  
 248 System (Ratnasingham and Hebert, 2013), and the Assemble Species by Automatic Partitioning



(ASAP) (Puillandre et al., 2021) and were supplemented by one tree-based phylogenetic approach using Generalized Mixed Yule Coalescent (GMYC) model-based method (Pons et al., 2006), according to Monaghan et al. (2009).

The Barcode Index Number (BIN) System (Ratnasingham and Hebert, 2013) in BOLD compares newly submitted sequences with the sequences already available. They are clustered according to their molecular divergence using distance-based algorithms (single linkage clustering followed by Markov clustering) that aim at finding discontinuities between Operational Taxonomic Units (OTU). Each OTU receives a unique and specific code (BIN), either already available or new if submitted sequences do not cluster with already-known BINs.

The Assemble Species by Automatic Partitioning (ASAP) (Puillandre et al., 2021) is a method that uses pairwise genetic distances to assemble individuals into groups and proposes species partitioning ranked according to a scoring system. For the purpose of the present study the first two partitions characterized by the lowest ASAP-scores were taken into account.

The GMYC method defines MOTUs through identification of the switch from intraspecific branching patterns (coalescent) to interspecific species branching patterns (Yule process) on a phylogenetic tree. Because for GMYC an ultrametric tree is required, as an input, a Bayesian tree was reconstructed in BEAST 2.6.3 (Bouckaert et al., 2019). The site model was set up with bModelTest (Bouckaert and Drummond, 2017). The tree prior was set to Birth-Death following Bayes factors. Two runs of Markov chain Monte Carlo (MCMC) were performed each 1 M generations-long, sampled every 1,000 generations. Runs were examined for convergence in Tracer 1.7 (Rambaut et al., 2018). The final tree was summarised with TreeAnnotator 2.6.3 with 25% burn-in, all being part of BEAST 2.6.3 package. The Bayesian tree was uploaded into the R 4.0.5 (R Core Team 2021) software package ‘SPLITS’ (Species Limits by Threshold Statistics) (Ezard et al., 2009) and analyzed using the single threshold model.

To visualize the delimitation results Neighbour-Joining (NJ) trees of all sequences divided into seven different family groups (details of each alignment provided in the Supplementary Material S1) were built based on the uncorrected *p*-distance matrix, with both transitions and transversions included and partial deletion chosen (Saitou and Nei 1987) in MEGA v.11.0.13 (Tamura et al., 2021). Node support was inferred with a bootstrap analysis (1000 replicates) (Felsenstein, 1985).

The lineages were collapsed according to their BINs assignment. The COI sequence of



279 freshwater isopod from the family Asellidae, *Asellus aquaticus* (Linnaeus, 1758) (GenBank  
280 accession number MN810583; Raupach et al., 2022), was used as an outgroup.  
281 In case of taxa represented in our dataset by five or more sequences (and at least two haplotypes)  
282 the molecular divergence of COI haplotypes (with all ambiguous positions excluded) was  
283 presented as Median Joining Network generated using PopART 1.7 (Bandelt et al., 1999).

284

## 285 **2.4 Species distribution**

286 The distribution of each recognized MOTU within the CCZ was checked. Additional check was  
287 done to infer which MOTUs were already recorded elsewhere in the World. To infer the range  
288 sizes of the MOTUs recorded pairwise distances between all stations were calculated with QGIS  
289 3.36 (QGIS, 2021) using standard distance plugin. For each MOTU that was recorded at more  
290 than one station the largest distance between the stations where they occurred was noted (given in  
291 values rounded to full kilometres).

292 Thanks to very high sequencing success associated with samples collected during three  
293 MANGAN expeditions that allowed to ascribe more than 80% of individuals caught to separate  
294 MOTUs, their composition in each haul was used in community analyses. The similarities  
295 between samples were calculated using the Bray–Curtis similarity formula on relative  
296 abundances of the MOTUs in each sample. Due to the fact that the difference between the most  
297 and the least abundant species was more than 20 times, and to increase the importance of  
298 singletons species which constituted 50% of all taxa, square root transformation of data was used.  
299 Hierarchical agglomerative clustering was performed using the group average method.  
300 Each assemblage discriminated was characterized using taxon richness (number of BINs),  
301 rarefaction (ES(50)), diversity (Shannon index) and evenness (Pielou index) indices (Magurran,  
302 2004).

303 All figures were adjusted for publication in Adobe Illustrator CS6.

304

## 305 **3 RESULTS**

306 Within the collection of 708 individuals 23 known and one undescribed families were identified  
307 (Table 3). The latter is presently in the description process (Horton et al., 2025e). Some  
308 representatives of the superfamilies Isaeoidea, Photoidea and Aoroidea were not identified further  
309 and are presented as “Corophioidea indet.”, whereas unidentified specimens of one of the three

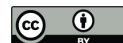

310 families: Lysianassidae, Tryphosidae and Uristidae are left as “Lysianassoidea indet.”. The COI  
311 gene analysis allowed to obtain 581 sequences that gave overall sequencing success at the level  
312 of 82%. The families that dominated barcoded material were Pardaliscidae (123 ind.) and  
313 Eusiridae (122 ind.). The other families that contributed largely to the material were: Synopiidae  
314 (74 ind.), Phoxocephalidae (70 ind.) and Oedicerotidae (51 ind.).  
315 Table 3. Number of individuals studied (No of ind.), COI sequences, Barcode Index Numbers  
316 (BINs), consensus number of Molecular Operational Taxonomic Units (MOTUs) based on  
317 different delimitation methods recognized in each family as well as the reference to the figure  
318 with NJ tree and MJN. Systematic division based on Myers and Lowry (2017), available online in  
319 World Amphipoda Database (Horton et al., 2025a).

|     | Suborder         | Parvorder                        | Superfamily      | Taxon                              | COI        | BINs       | MOTUs      | tree & MJN |
|-----|------------------|----------------------------------|------------------|------------------------------------|------------|------------|------------|------------|
| 1.  | Amphilochidea    | Amphilochidira                   | Iphimedioidea    | Stilipedidae                       | 2          | 2          | 2          | Fig. 3     |
| 2.  |                  |                                  | Leucothoidea     | Leucothoidae                       | 3          | 2          | 2          |            |
| 3.  |                  | Eusiridira                       | Eusiroidea       | Eusiridae                          | 122        | 32         | 32         |            |
| 4.  |                  |                                  | Liljeborgioidea  | Liljeborgiidae                     | 4          | 4          | 4          |            |
| 5.  |                  | Haustoriidira                    | Haustorioidea    | Phoxocephalidae                    | 70         | 14         | 14         | Fig. 4     |
| 6.  |                  | Lysianassidira                   | Alicelloidea     | Alicellidae                        | 1          | 1          | 1          | Fig. 5     |
| 7.  |                  |                                  |                  | Valettiopsidae                     | 1          | 1          | 1          |            |
| 8.  |                  |                                  |                  | Vemanidae                          | 1          | 1          | 1          |            |
| 9.  |                  |                                  | Lysianassoidea   | Cyphocarididae                     | 4          | 2          | 2          |            |
| 10. |                  |                                  |                  | Hirondelleidae                     | 2          | 1          | 1          |            |
| 11. |                  |                                  |                  | Tryphosidae                        | 23         | 6          | 6          |            |
| 12. |                  |                                  |                  | Uristidae                          | 7          | 6          | 6          |            |
| 13. |                  |                                  |                  | Lysianassoidea indet. <sup>b</sup> | 16         | 6          | 6          |            |
| 14. |                  |                                  | Stegocephaloidea | Stegocephalidae                    | 9          | 5          | 5          |            |
| 15. |                  | Oedicerotidira                   | Oedicerotoidea   | Oedicerotidae                      | 51         | 22         | 21         | Fig. 6     |
| 16. |                  | Synopiidira                      | Dexaminoidea     | Lepechinellidae                    | 5          | 3          | 3          | Fig. 7     |
| 17. |                  |                                  |                  | Melphidippidae                     | 2          | 1          | 1          |            |
| 18. |                  |                                  |                  | Pardaliscidae                      | 123        | 44         | 44         |            |
| 19. |                  |                                  | Synopioidea      | Ampeliscidae                       | 13         | 3          | 3          | Fig. 8     |
| 20. |                  |                                  |                  | Synopiidae                         | 74         | 31         | 31         |            |
| 21. | Hyperioptidea    | Hyperioptidira                   | Hyperioptsoidea  | Hyperioptidae                      | 7          | 4          | 4          | Fig. 9     |
| 22. | Senticaudata     | Caprellidira                     | Caprelloidea     | Dulichidae                         | 1          | 1          | 1          |            |
| 23. |                  | Corophiidira                     | Aorioidea        | Unciolidae                         | 2          | 1          | 1          |            |
| 24. |                  | Corophioidea indet. <sup>a</sup> |                  |                                    | 19         | 5          | 5          |            |
| 25. |                  | Hadziidira                       | Calliopioidea    | Calliopidae                        | 2          | 1          | 1          |            |
| 26. |                  |                                  |                  | Fam. nov.                          | 12         | 5          | 5          |            |
| 27. | Amphipoda indet. |                                  |                  |                                    | 5          | 4          | 4          |            |
|     |                  |                                  |                  | <b>Total</b>                       | <b>581</b> | <b>208</b> | <b>207</b> |            |

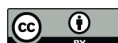

320 The delimitation methods identified from 184 (ASAP with the lowest ASAP-score, threshold  
321 distance – 0.085925) up to 270 (GMYC) MOTUs (Figs 3–9). Although large variation in absolute  
322 numbers the differences in the number of recognized MOTUs concerned a small number of taxa  
323 and in 17 cases indicated obvious oversplitting of single units. The consensus delimitation  
324 identified 207 MOTUs that are congruent with BINs ascription with an exception of one unit  
325 within Oedicerotidae, namely two BINs of *Bathymedon* sp. (BOLD:AEA9456 and  
326 BOLD:AGC2705) that according to all other methods constitute one MOTU. The *p*-distance  
327 between these two BINs is 0.025 but only two sequences are available so it is impossible to infer  
328 the intraspecific variation in this case. There are additional six cases where consensus  
329 delimitation shall be treated with caution: two within the families: Phoxocephalidae (Fig. 4) and  
330 Synopiidae (Fig. 8), one within Pardaliscidae (Fig. 7) as well as within undescribed family of  
331 Senticaudata (Fig. 9). In all presented cases additional genes and preferably more individuals  
332 shall be studied to help with final delimitation of these taxa.

333 The family with the largest number of identified taxa was Pardaliscidae (44 MOTUs), followed  
334 by Eusiridae (32 MOTUs) and Synopiidae (31 MOTUs). The most species rich genus was  
335 *Rhachotropis* (Eusiridae) where 14 MOTUs were identified. It was followed by *Cleonardo*  
336 (Eusiridae) represented by 11 MOTUs and *Syrrhoe* (Synopiidae) with 9 MOTUs recognized.  
337 *Caleidoscopsis* (8 MOTUs) and *Pardaliscopsis* (6 MOTUs) were the two genera within  
338 Pardaliscidae with the highest number of taxa delimited. Other recognized genera were  
339 represented by smaller number of species but large part of the material (particularly from  
340 MANGAN 2023 expedition) was identified only to the family level.

341

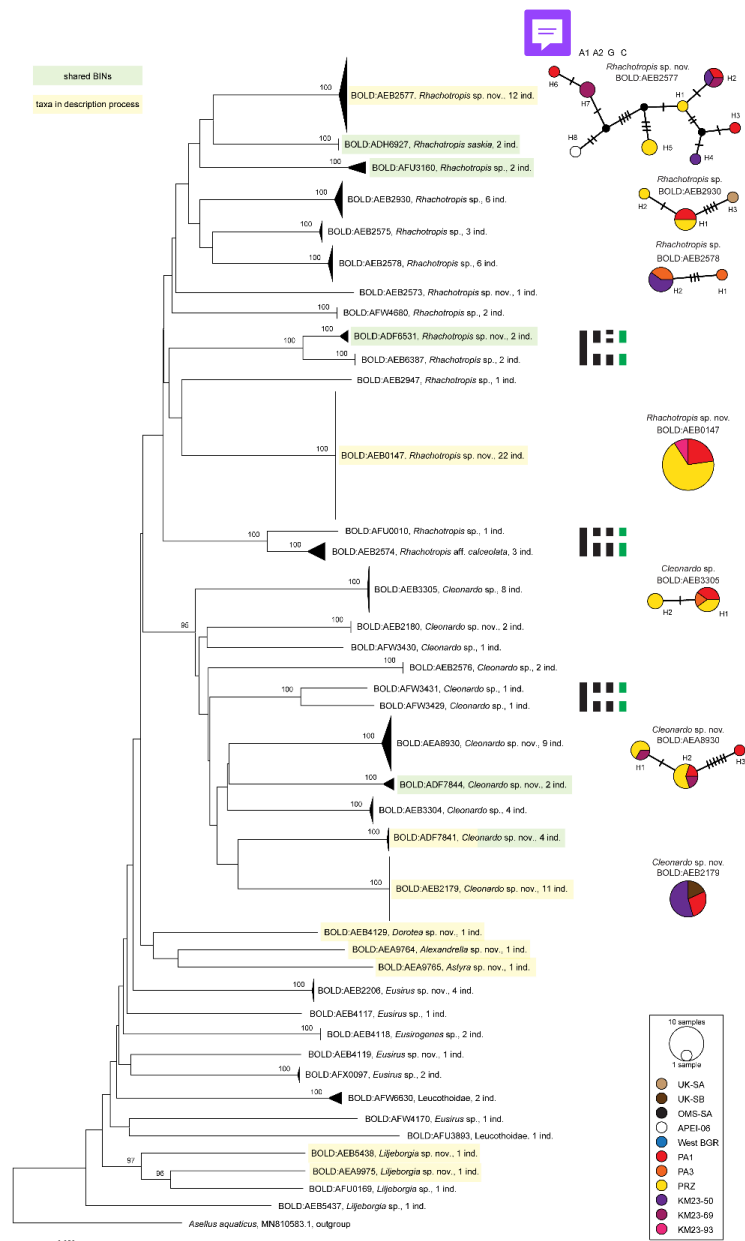

Figure 3. Neighbour-joining (NJ) tree of COI sequences of amphipods belonging to the families Eusiridae, Leucothoidae, Liljeborgiidae, and Stilipedidae (parvorders Amphilochidira and Eusiridira). The distances were calculated with p-distance. Triangles indicate the relative number of individuals studied (height) and sequence divergence (width). The numbers in front of the nodes indicate bootstrap support (1000 replicates, only values higher than 50% are presented). The vertical bars represent species delimitations taxonomies obtained from different species delimitation methods (A1: BIN, A2: ASAP, G: GMYC, C: consensus). Only the cases where incongruence between different delimitation methods were observed are shown. Note that this tree is not the reconstruction of evolutionary history of presented taxa.

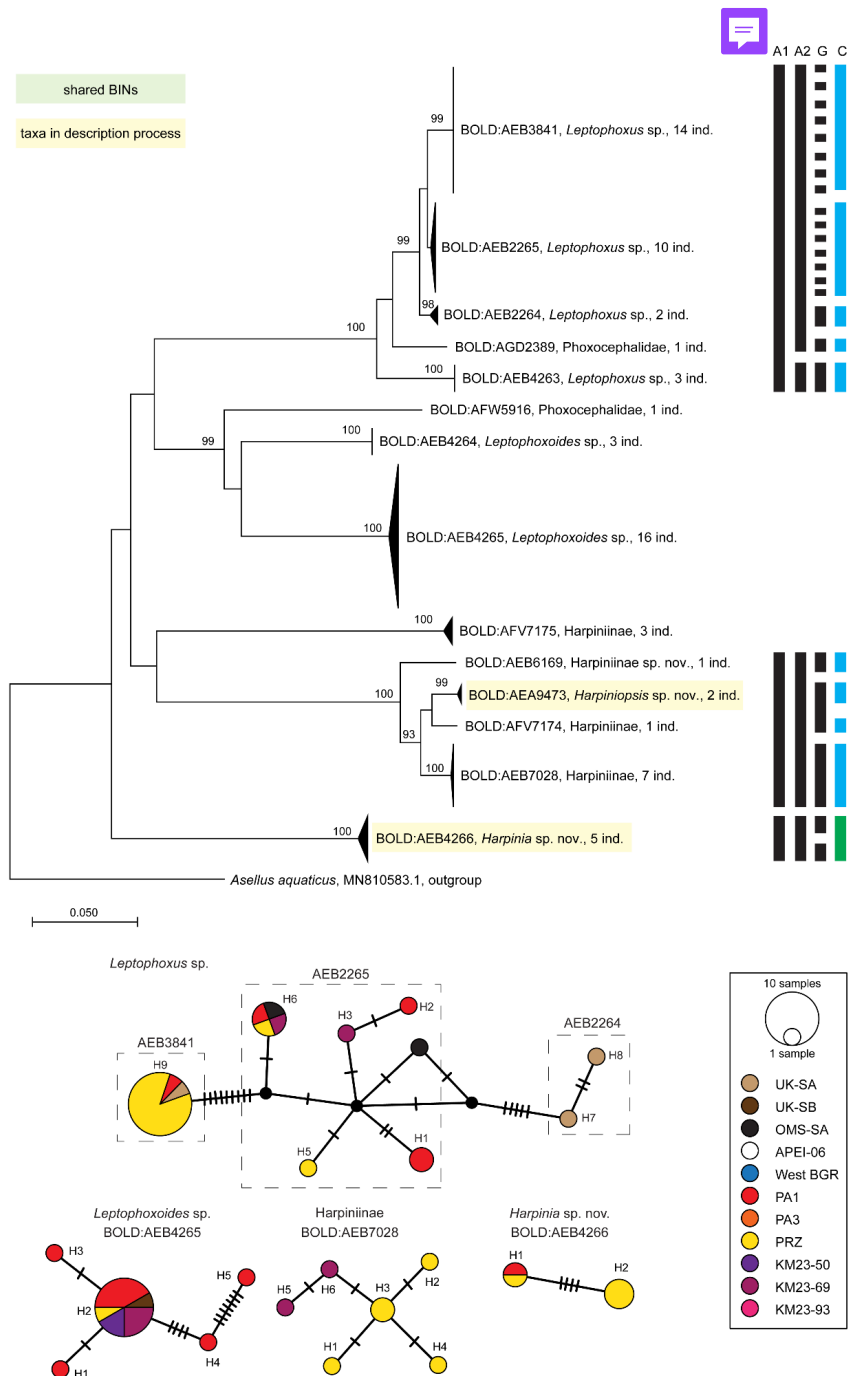

351  
352 Figure 4. Neighbour-joining (NJ) tree of COI sequences of amphipods belonging to the family  
353 Phoxocephalidae. Details about the calculation and presentation of the tree as in Fig. 3

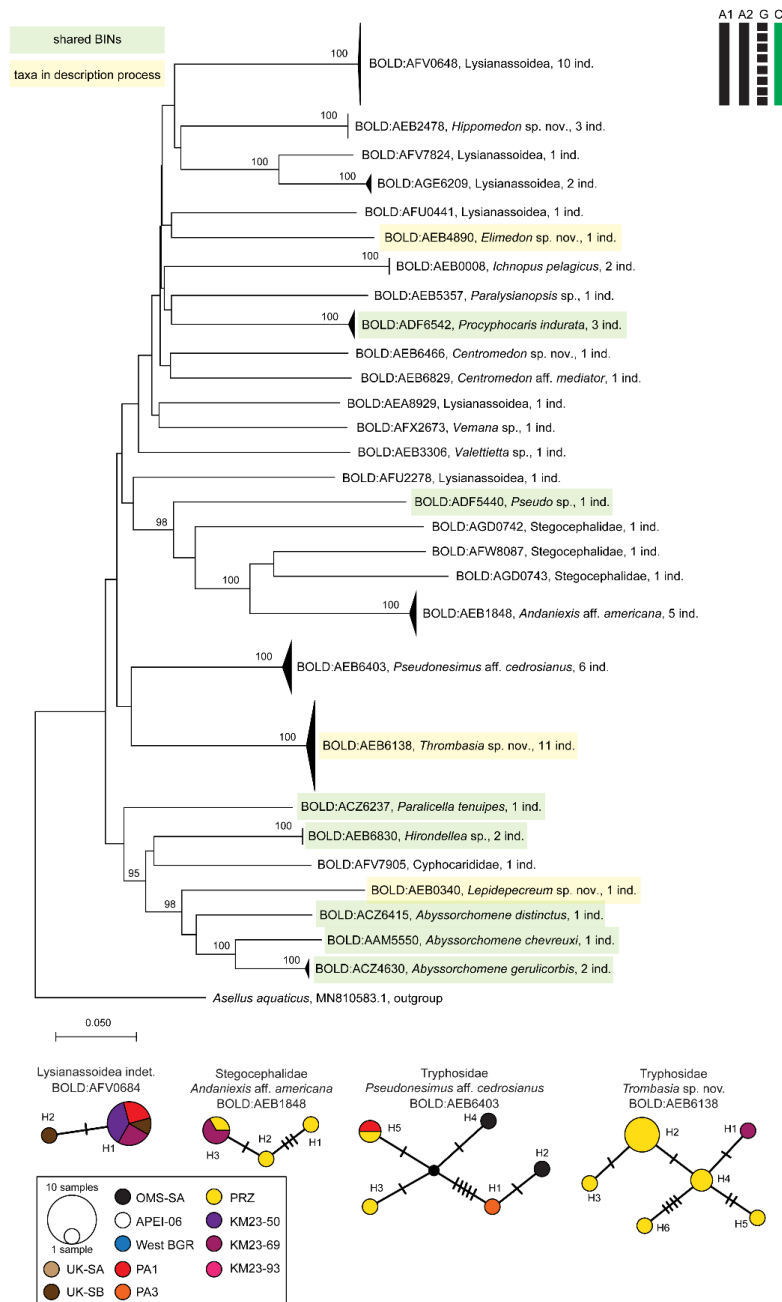

354  
355 Figure 5. Neighbour-joining (NJ) tree of COI sequences of amphipods belonging to the parvorder  
356 Lysianassidira (for families see Table 3). Details about the calculation and presentation of the tree  
357 as in Fig. 3.

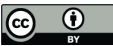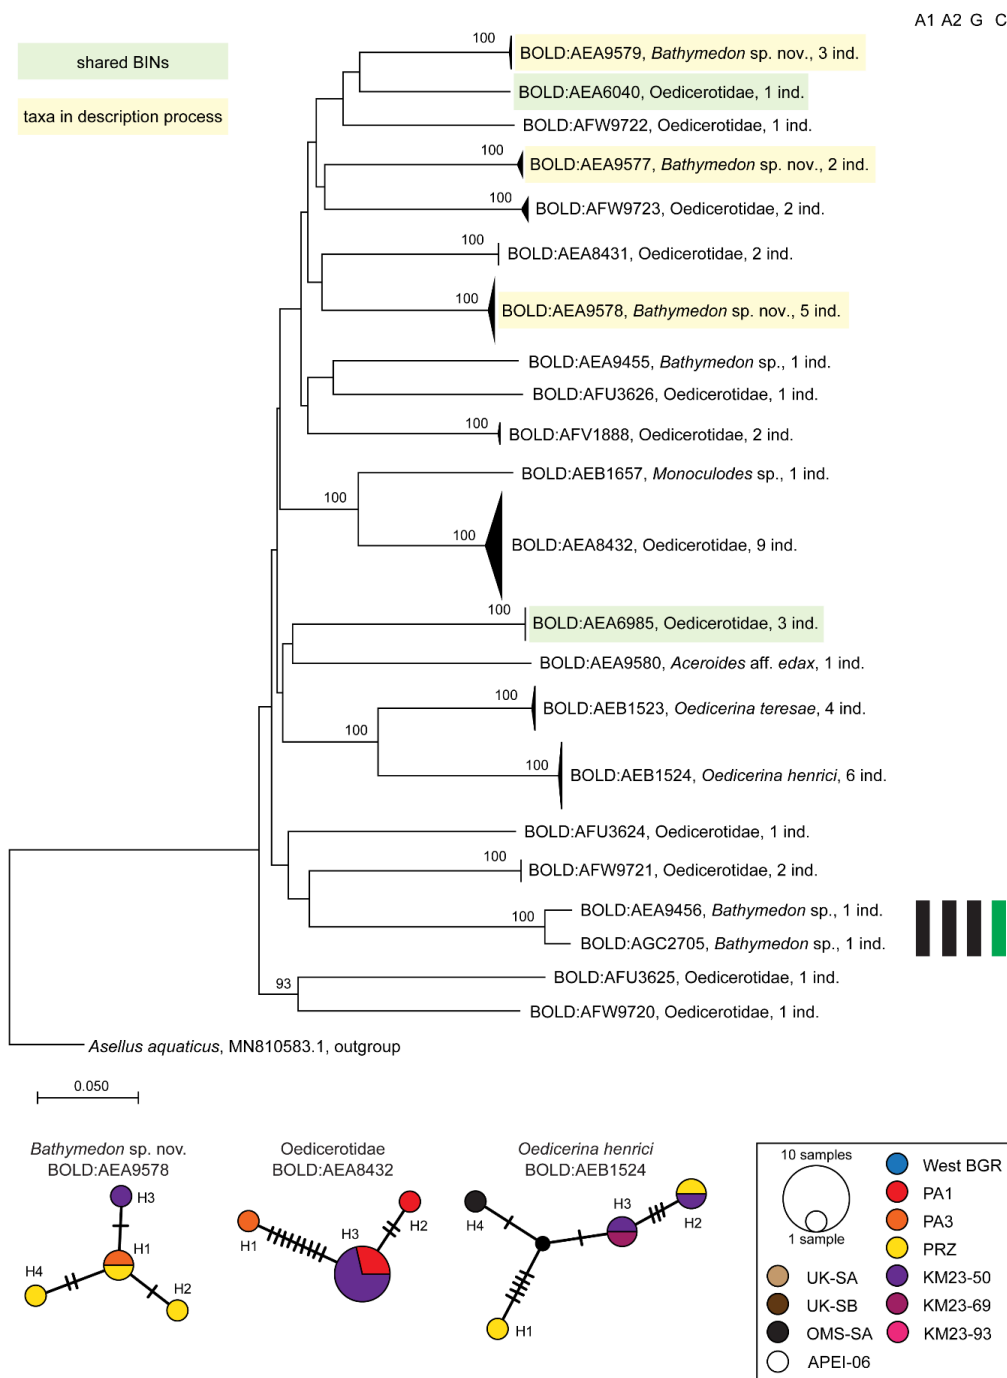

358

359 Figure 6. Neighbour-joining (NJ) tree of COI sequences of amphipods belonging to the family  
360 Oedicerotidae. Details about the calculation and presentation of the tree as in Fig. 3.

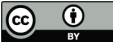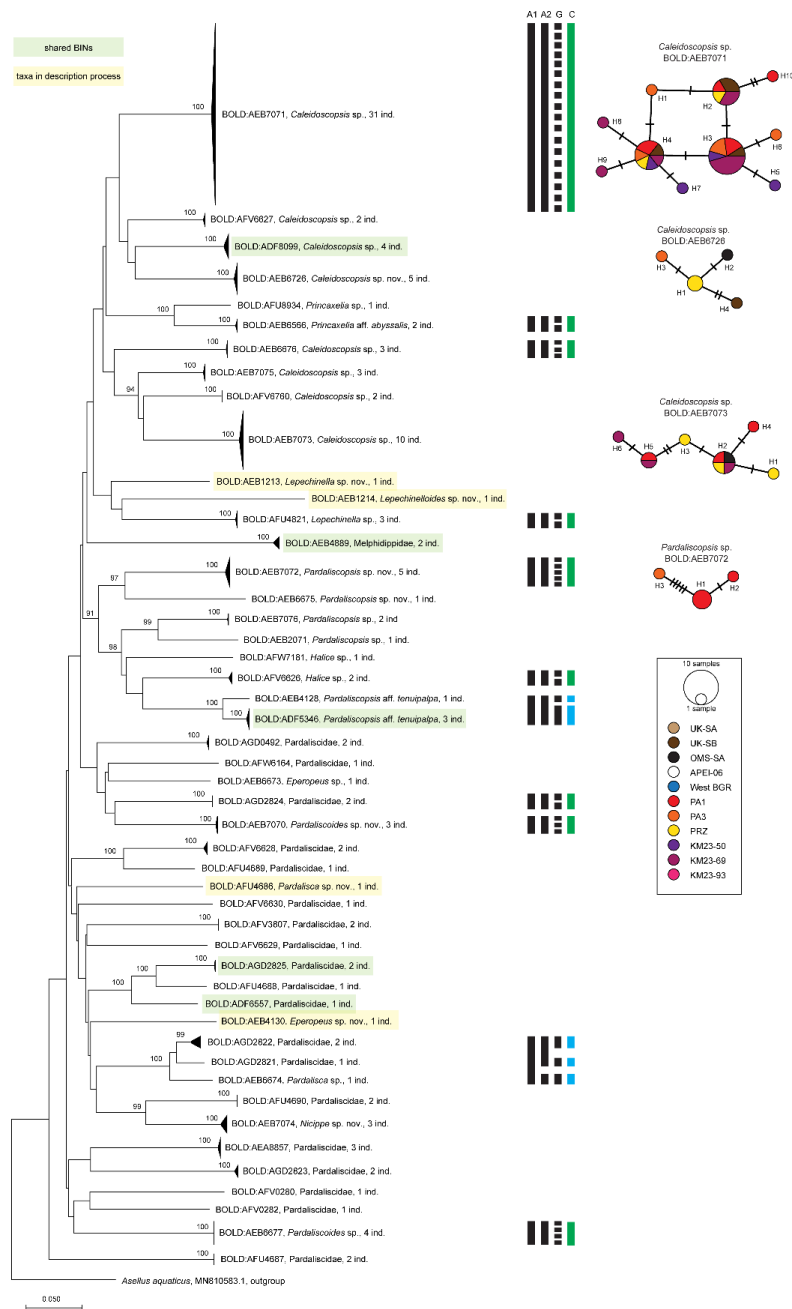

361

362

363

364

Figure 7. Neighbour-joining (NJ) tree of COI sequences of amphipods belonging to the families Pardaliscidae, Lepechinellidae, Melphidippidae. Details about the calculation and presentation of the tree as in Fig. 3.

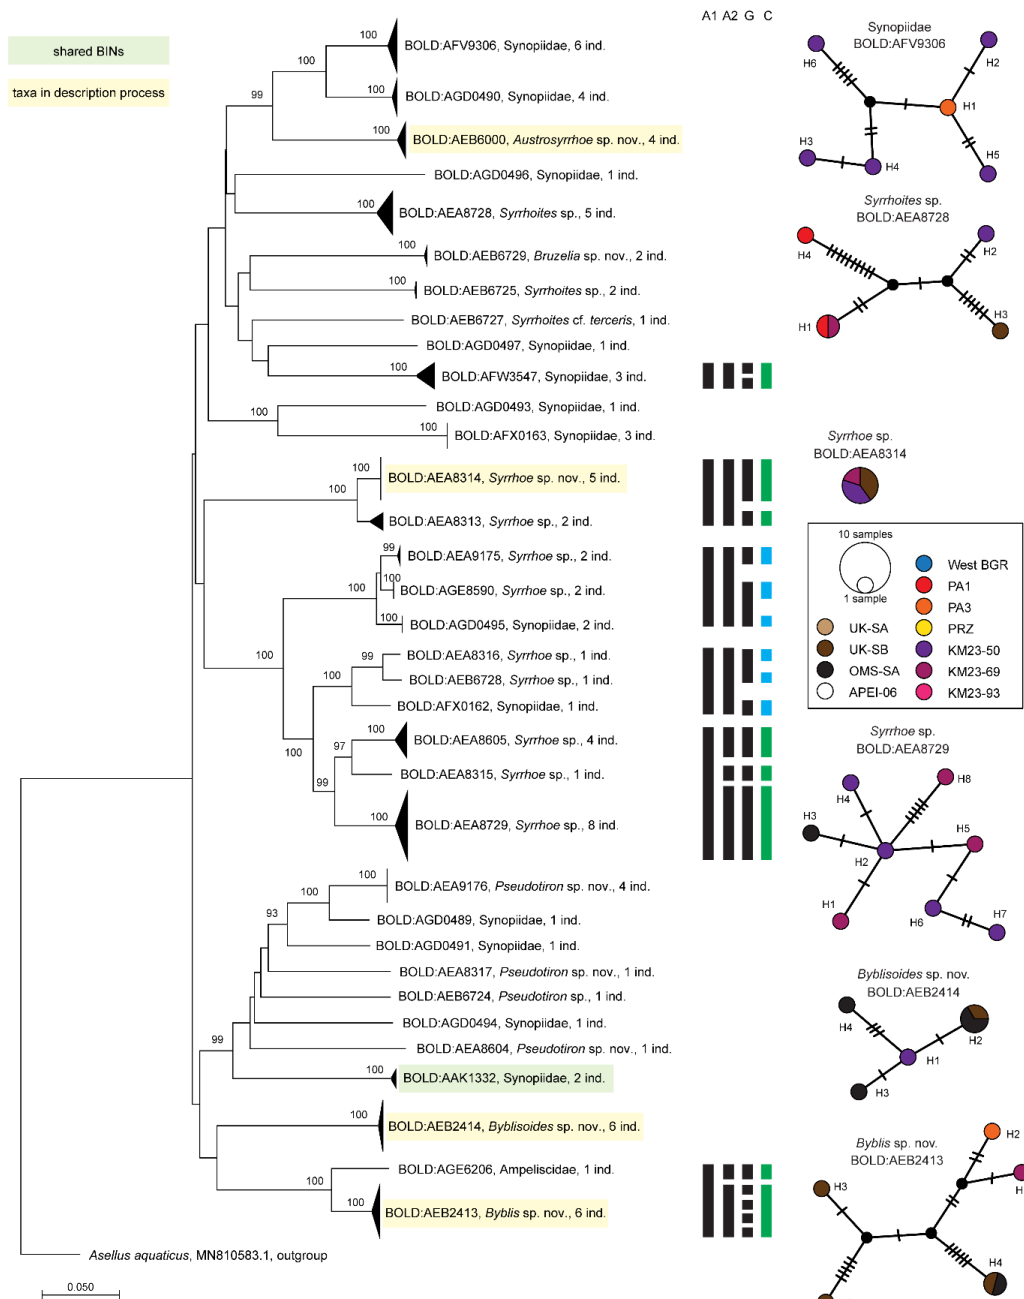

365  
366 Figure 8. Neighbour-joining (NJ) tree of COI sequences of amphipods belonging to the families  
367 Synopiidae, Ampeliscidae. Details about the calculation and presentation of the tree as in Fig. 3.  
368

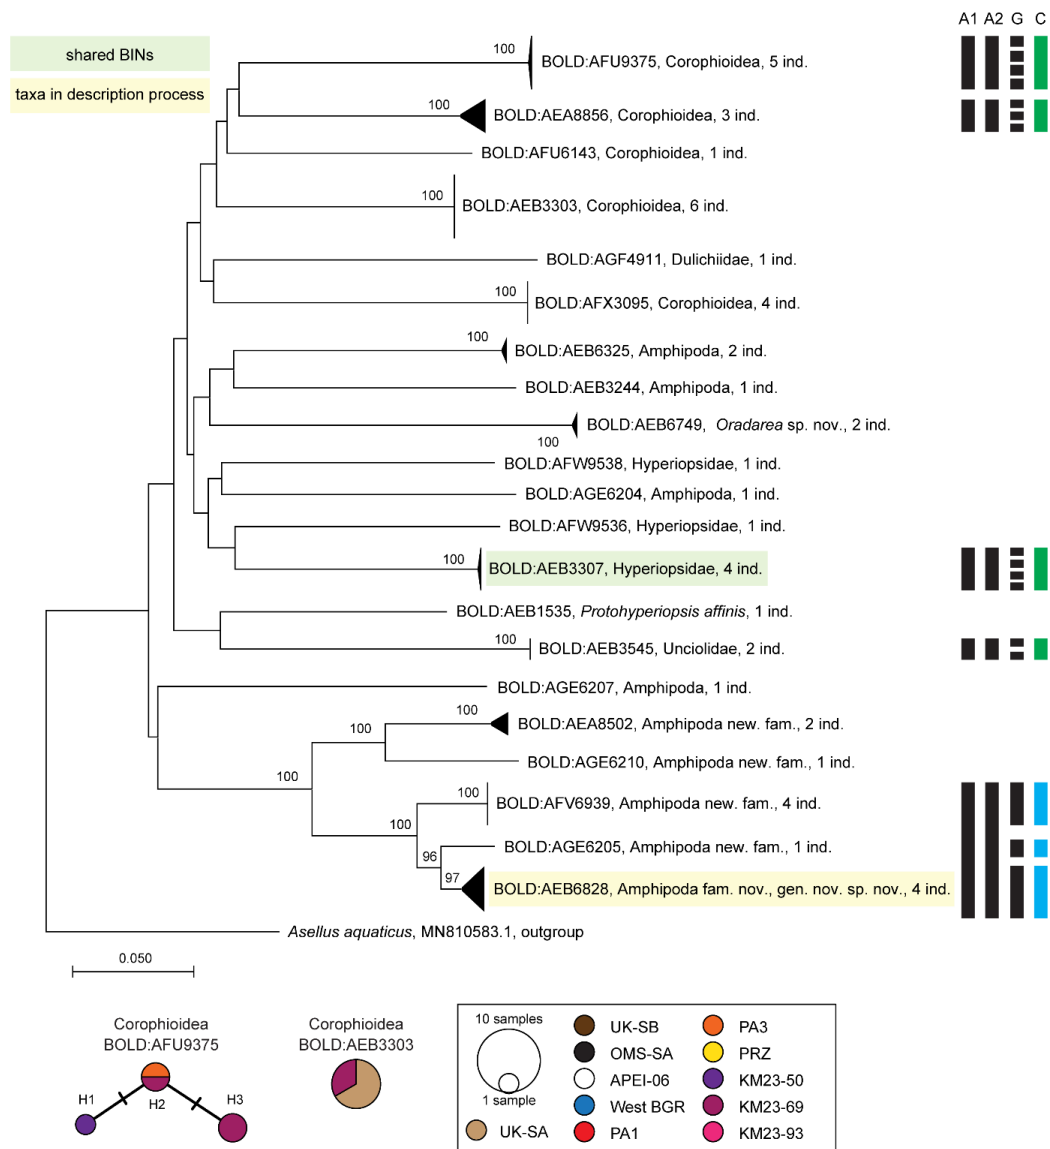

369  
370 Figure 9. Neighbour-joining (NJ) tree of COI sequences of amphipods belonging to the families  
371 Dulichiidae, Calliopiidae, Hyperipsidae, Unciolidae, Mirabestidae fam. nov. and unidentified  
372 taxa. Details about the calculation and presentation of the tree as in Fig. 3.

373  
374 Combined morphological and molecular identification revealed ten known species: *Rhachotropis*  
375 *saskia* (Eusiridae), *Abyssorchomene chevreuxi*, *A. distinctus*, *A. gerulicorbis*, *Ichnopus pelagicus*



376 (Uristidae), *Paralicella tenuipes* (Alicellidae), *Procyphocaris indurata* (Cyphocarididae),  
377 *Oedicerina henrici*, *O. teresae* (Oedicerotidae, described on the basis of presently studied  
378 material, Jażdżewska et al., 2022), and *Protohyperiopsis affinis* (Hyperiopsidae). Additional  
379 seven taxa were identified as closely resembling known species but with some level of  
380 uncertainty: *Rhachotropis* aff. *calceolata* (Eusiridae), *Centromedon* aff. *mediator* (Uristidae),  
381 *Pseudonesimus* aff. *cedrosianus* (Tryphosidae), *Andaniexis* aff. *americana* (Stegocephalidae),  
382 *Aceroides* aff. *edax* (Oedicerotidae), *Princaxelia* aff. *abyssalis*, *Pardaliscopsis* aff. *tenuipalpa*  
383 (*Pardaliscidae*). Final identification was often hindered by the presence of only single  
384 representatives of particular taxon and the damage of the material. Apart from known species the  
385 study of the material allowed to recognize one undescribed family (Horton et al., 2025e) and at  
386 least 48 undescribed species; two of them were already described based on the present material  
387 (Jażdżewska et al., 2022), while 27 are in the description process (Andrade and Jażdżewska,  
388 2025; Biniek et al., 2025; Horton and Lörz, 2025; Horton et al., 2025b-e; Hughes and Tandberg,  
389 2025a, b; Jażdżewska and Horton, in prep, Lörz et al., 2025; Peart and Lörz 2025; Peart and  
390 Stewart, 2025; Tandberg and Huges, 2025; Timm et al., 2025; Wróblewski and Jażdżewska,  
391 2025).

392 Out of 207 MOTUs recognized as many as 94 were singletons (45% of taxa) while additional 49  
393 – doubletons (24% of taxa), only 32 (15%) reached the criterium of being represented by more  
394 than five individuals and their haplotypes networks are presented (Figs 3–9). Half of these  
395 MOTUs were represented by one to three haplotypes differing in few mutations. Higher diversity  
396 of haplotypes was recorded within one MOTU of Eusiridae (*Rhachotropis* sp. nov.,  
397 BOLD:AEB2577), three MOTUs of Phoxocephalidae (*Leptophoxus* sp., BOLD:AEB2265,  
398 *Leptophoxoides* sp., BOLD:AEB4265, Harpiniinae, BOLD:AEB7028), two MOTUs of  
399 Tryphosidae (*Pseudonesimus* aff. *cedrosianus*, BOLD:AEB6403, *Thrombasia* sp. nov.,  
400 BOLD:AEB6138), two MOTUs of Oedicerotidae (*Oedicerina henrici*, BOLD:AEB1524,  
401 *Bathymedon* sp. nov., BOLD:AEA9578), three MOTUs of Pardaliscidae (*Caleidoscopsis* sp.,  
402 BOLD:AEB7071, *Caleidoscopsis* sp., BOLD:AEB6726, *Caleidoscopsis* sp., BOLD:AEB7073),  
403 three MOTUs of Synopiidae (*Syrrhoites* sp., BOLD:AEA8728, *Syrrhoes* sp., BOLD:AEA8729,  
404 Synopiidae, BOLD:AFV9306), and two of Ampeliscidae (*Byblis* sp. nov., BOLD:AEB2413,  
405 *Byblisoides* sp. nov., BOLD:AEB2414) (Figs 3–9).



No MOTUs represented by more than five individuals was shared between ~~East~~ and ~~West~~ regions of the CCZ as well as between ~~West~~ region of CCZ and APEI-06. Only one, *Rhachotropis* sp. nov. (BOLD:AEB2577) was shared between ~~East~~ region and APEI-06. In a broader scale 187 recognized BINs (and subsequently 186 MOTUs) were unique for the present study, while the remaining 21 were shared with other studies and belonged to broadly distributed taxa (Table 4).

Table 4. MOTUs represented by Barcode Index Numbers (BIN) shared between present and former studies with information about their taxonomic affiliation, geographic distribution and ecology. Areas: UKSR – UK contractor area, OMS – Singapore contractor area, BGR – BGR contractor area East, BGRW – BGR contractor area West, KKT – Kuril-Kamchatka Trench area, NW Pacific – North West Pacific, area not specified, NE Pacific – North East Pacific, area not specified. Asterisk indicates cases where feeding type was confirmed for particular taxon. In case of wide distribution and repeated ecological studies only representative publications cited.

| Family          | BIN          | Taxon name                            | Present study |            | Distribution       |                                                              | Ecology                       |                                    |                                                             |
|-----------------|--------------|---------------------------------------|---------------|------------|--------------------|--------------------------------------------------------------|-------------------------------|------------------------------------|-------------------------------------------------------------|
|                 |              |                                       | No. ind.      | Area       | Outside CCZ        | References                                                   | Feeding type                  | Mobility                           | References                                                  |
| Alicellidae     | BOLD:ACZ6237 | <i>Paralicella tenuipes</i>           | 1             | UKSR       | Cosmopolitan       | Jażdżewska et al. 2021                                       | scavenger*                    | highly mobile swimmer              | Jażdżewska et al. 2021                                      |
| Cyphocarididae  | BOLD:ADF6542 | <i>Procyphocaris indurata</i>         | 3             | BGRE, OMS  | KKT                | Jażdżewska and Mamos 2019                                    | unknown                       | abyssopelagic / epibenthic swimmer | Hendrycks and Conlan 2003                                   |
| Eusiridae       | BOLD:ADF7841 | <i>Cleonardo</i> sp. nov.             | 4             | BGRE, OMS  | KKT                | Jażdżewska and Mamos 2019                                    | predator                      | epibenthic swimmer                 | Bousfield and Hendrycks 1995                                |
| Eusiridae       | BOLD:ADF7844 | <i>Cleonardo</i> sp. nov.             | 2             | BGRE       | KKT                | Jażdżewska and Mamos 2019                                    | predator                      | epibenthic swimmer                 | Bousfield and Hendrycks 1995                                |
| Eusiridae       | BOLD:ADF6531 | <i>Rhachotropis</i> sp.               | 2             | BGRE       | KKT                | Jażdżewska and Mamos 2019                                    | predator                      | epibenthic swimmer                 | Bousfield and Hendrycks 1995                                |
| Eusiridae       | BOLD:ADH6927 | <i>Rhachotropis saskia</i>            | 2             | UKSR, BGRW | KKT                | Lörz et al. 2018, Jażdżewska and Mamos 2019                  | predator*                     | epibenthic swimmer                 | Lörz et al. 2018                                            |
| Eusiridae       | BOLD:AFU3160 | <i>Rhachotropis</i> sp.               | 2             | BGRW       | NE Pacific         | Jażdżewska, unpublished                                      | predator                      | epibenthic swimmer                 | Lörz et al. 2018                                            |
| Hirondelleidae  | BOLD:AEB6830 | <i>Hirondellea</i> sp.                | 2             | BGRE       | Indian Ocean       | Kniesz et al. 2022                                           | scavenger*                    | highly mobile swimmer              | Kniesz et al. 2022                                          |
| Hyperopsidae    | BOLD:AEB3307 | Hyperopsidae                          | 4             | UKSR, BGRE | NE Pacific         | Jażdżewska, unpublished                                      | unknown                       | pelagic                            | Barnard and Karaman 1991                                    |
| Melphidippidae  | BOLD:AEB4889 | Melphidippidae                        | 2             | BGRE       | NE Pacific         | Jażdżewska, unpublished                                      | passive suspension feeder     | epibenthic, fast swimming          | Enequist 1949, De Broyer et al. 2001                        |
| Oedicerotidae   | BOLD:AEA6040 | Oedicerotidae                         | 1             | BGRW       | NW Pacific         | Jażdżewska, unpublished                                      | deposit feeder or carnivorous | sediment dweller                   | Brix et al. 2018                                            |
| Oedicerotidae   | BOLD:AEA6985 | Oedicerotidae                         | 3             | BGRW       | NW Pacific         | Jażdżewska, unpublished                                      | deposit feeder or carnivorous | sediment dweller                   | Brix et al. 2018                                            |
| Pardaliscidae   | BOLD:ADF8099 | <i>Caleidoscopsis</i> sp.             | 4             | BGRW       | KKT                | Jażdżewska and Mamos 2019                                    | predator                      | epibenthic or demersal             | Hendrycks and Conlan 2003, Brix et al. 2018                 |
| Pardaliscidae   | BOLD:ADF5346 | <i>Pardaliscopsis aff. tenuipalpa</i> | 3             | BGRE       | KKT                | Jażdżewska and Mamos 2019                                    | predator                      | epibenthic or demersal             | Hendrycks and Conlan 2003, Brix et al. 2018                 |
| Pardaliscidae   | BOLD:ADF6557 | Pardaliscidae                         | 1             | BGRW       | KKT                | Jażdżewska and Mamos 2019                                    | predator                      | epibenthic or demersal             | Hendrycks and Conlan 2003, Brix et al. 2018                 |
| Pardaliscidae   | BOLD:AGD2825 | Pardaliscidae                         | 2             | BGRE       | NE Pacific         | Jażdżewska, unpublished                                      | predator                      | epibenthic or demersal             | Hendrycks and Conlan 2003, Brix et al. 2018                 |
| Stegocephalidae | BOLD:ADF5440 | <i>Pseudo</i> sp.                     | 1             | BGRE       | KKT                | Jażdżewska and Mamos 2019                                    | predator                      | benthopelagic                      | Brix et al. 2018                                            |
| Synopiidae      | BOLD:AAK1332 | Synopiidae                            | 2             | BGRE       | Belize             | Browne et al. 2007                                           | unknown                       | pelagic                            | Browne et al. 2007 (collected at 0–10 m in the open waters) |
| Uristidae       | BOLD:AAM5550 | <i>Abyssorchomene chevreuxi</i>       | 1             | BGRE       | widely distributed | Havermans et al. 2010, Fujii et al. 2013, Horton et al. 2020 | scavenger*                    | highly mobile swimmer              | Horton et al. 2020                                          |



|           |              |                                    |   |      |                    |                                                    |            |                       |                               |
|-----------|--------------|------------------------------------|---|------|--------------------|----------------------------------------------------|------------|-----------------------|-------------------------------|
| Uristidae | BOLD:ACZ6415 | <i>Abyssorchomene distinctus</i>   | 1 | BGRE | widely distributed | Kniesz et al. 2022, Dupont et al. 2024,            | scavenger* | highly mobile swimmer | Patel et al. 2020             |
| Uristidae | BOLD:ACZ4630 | <i>Abyssorchomene gerulicorbis</i> | 2 | BGRE | widely distributed | Barnard and Shulenberger 1976, Horton et al. 2020, | scavenger* | highly mobile swimmer | Barnard and Shulenberger 1976 |

418

419 Of them nine species were shared between CCZ and the region of Kuril-Kamchatka Trench. Two  
420 MOTUs were shared with NW Pacific and next four with NE Pacific – the sequences of these  
421 taxa from outside CCZ are present in BOLD but they are stored privately, so specific localities  
422 are not available. One species found in CCZ was previously recorded from the Indian Ocean,  
423 another one was already caught in the Caribbean Sea. The remaining four taxa are known from  
424 their wide (sometimes even cosmopolitan) geographic distribution. Among the MOTUs recorded  
425 only in CCZ and sampled at two or more stations 32 were found at localities within 100 km  
426 distance. The next 35 MOTUs were recorded within the range of 101–200 km, followed by  
427 eleven found within 300 km distance and one not exceeding 400 km (its range reached 308 km)  
428 (Fig. 10, Supplementary Table S2). Only one species, *Rhachotropis* sp. nov. (BOLD:AEB2577)  
429 was present within 1000 km distance between the furthest stations, while five: *Cleonardo* sp.  
430 (BOLD:AEB2180), Fam. nov., gen. nov., sp. nov. (BOLD:AEB6828), *Bathymedon* sp. nov.  
431 (BOLD:AEA9579), Oedicerotidae (BOLD:AFW9721) and *Austrosyrrhoe* sp. nov.  
432 (BOLD:AEB6000) were recorded at the stations within more than 2000 km distance (Table 5).

433

434 Table 5. MOTUs represented by Barcode Index Numbers (BIN) found only in CCZ with the largest  
435 distribution ranges with information about their taxonomic affiliation, geographic distribution and  
436 ecology. Areas: APEI-06 – Area of Particular Environmental Interest No. 6, BGRE –BGR contractor area  
437 East, BGRW – BGR contractor area West.

438

| Family        | BIN          | Taxon name                     | No. ind. | Area          | Distance between furthest stations [km] | Ecology                        |                    |                              |
|---------------|--------------|--------------------------------|----------|---------------|-----------------------------------------|--------------------------------|--------------------|------------------------------|
|               |              |                                |          |               |                                         | Feeding type                   | Mobility           | References                   |
| Eusiridae     | BOLD:AEB2577 | <i>Rhachotropis</i> sp. nov.   | 12       | APEI-06, BGRE | 988                                     | predator                       | epibenthic swimmer | Bousfield and Hendrycks 1995 |
| Eusiridae     | BOLD:AEB2180 | <i>Cleonardo</i> sp.           | 2        | BGRE, BGRW    | 2377                                    | predator                       | epibenthic swimmer | Bousfield and Hendrycks 1995 |
| New family    | BOLD:AEB6828 | Fam. nov., gen. nov., sp. nov. | 4        | BGRE, BGRW    | 2239                                    | unknown                        | unknown            | unavailable                  |
| Oedicerotidae | BOLD:AEA9579 | <i>Bathymedon</i> sp. nov.     | 3        | BGRE, BGRW    | 2292                                    | deposit feeders or carnivorous | sediment dweller   | Brix et al. 2018             |
| Oedicerotidae | BOLD:AFW9721 | Oedicerotidae                  | 2        | BGRE, BGRW    | 2293                                    | deposit feeders or carnivorous | sediment dweller   | Brix et al. 2018             |
| Synopiidae    | BOLD:AEB6000 | <i>Austrosyrrhoe</i> sp. nov.  | 4        | BGRE, BGRW    | 2239                                    | unknown                        | epibenthic?        | unavailable                  |

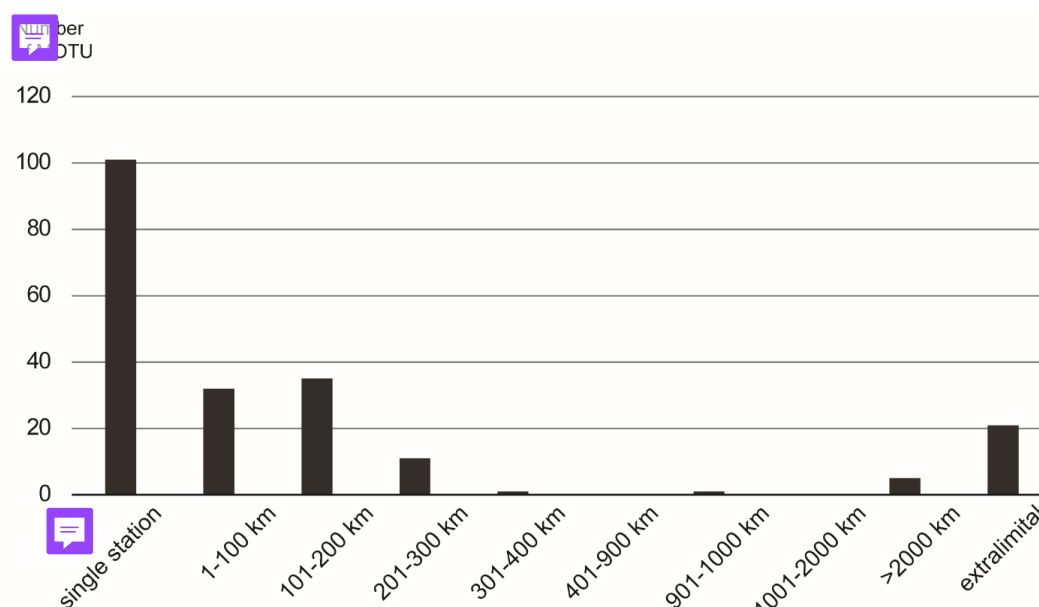

439

440 Figure 10. Number of MOTUs recorded at stations within distribution ranges. Extralimital:  
441 MOTUs shared with regions outside CCZ.

442

443 The cluster analysis of the fauna collected during three MANGAN expeditions at the level of  
444 10% similarity revealed four groups (A–D, of which one is represented by only single station)  
445 (Fig. 11A). In general, the similarities between studied stations were very low and oscillated from  
446 almost 0% to ca. 40%. There was almost no similarity between the stations situated in the West  
447 part of the CCZ area (group A, West BGR) and the ones from the eastern part of the studied  
448 region (groups B, C, D, East BGR). In case of stations from East BGR their geographic proximity  
449 does not influence clustering. The diversity indices showed that the single station forming group  
450 B is characterized by low values of species richness, ES(50) and Shannon indices (Fig. 11B). In  
451 contrary the highest values of these indices were characteristic for the group C. The groups A and  
452 D were less species rich and diverse and presented similar mean values of diversity indices. The  
453 index of a very high value and low variety for all identified clusters was evenness (Pielou index)  
454 with the mean value ranging from 0.961 to 0.986; only one station within group D had value of  
455 this index lower than 0.850. Due to low similarity within the groups and very high evenness as  
456 well as lack of clear geographic grouping the composition of identified assemblages was not  
457 studied further.

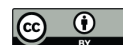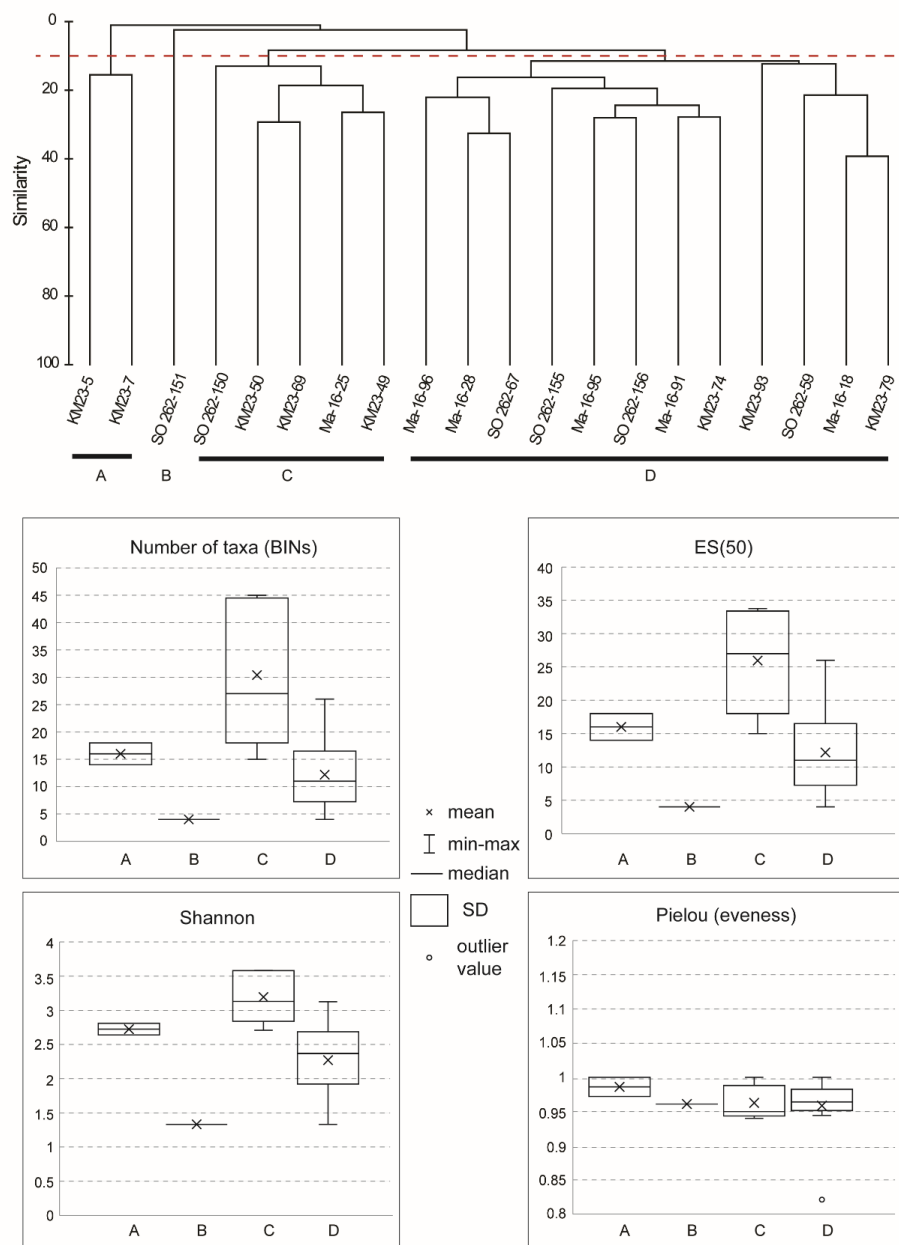

458

459 Figure 11. Upper – cluster analysis of stations from BGR contractor area (Bray-Curtis similarity  
460 of square-root transformed relative abundances, group average grouping method), dashed line  
461 placed at the similarity level of 10%. Lower – comparison of diversity measures for each  
462 distinguished group of samples.



463

## 464 **4 DISCUSSION**

### 465 **4.1 Low abundance, high species richness**

466 Our study of relatively small amphipod collection (sequences obtained from 581 ind.) revealed  
467 high species richness, expressed by identification of as many as 207 MOTUs. This corroborate  
468 with studies of Amphipoda conducted in other deep-sea Pacific areas using integrative taxonomy.  
469 For example, in the ~~North West~~ Pacific in the Kuril-Kamchatka Trench and adjacent abyssal plain  
470 133 MOTUs were identified from the collection of 510 individuals (Jażdżewska and Mamos,  
471 2019), while in the Aleutian Trench, adjacent abyss and the abyssal Bering Sea over 150 MOTUs  
472 were recorded after study of 450 individuals (pers. obs.). Also in the ~~South West~~ Pacific high  
473 deep-sea amphipod species richness was observed (263 MOTUs identified from 953 sequences,  
474 Knox et al., 2020). The numerically dominant and the most species rich families in the studied  
475 material were: Pardaliscidae, Eusiridae, Synopiidae, Phoxocephalidae and Oedicerotidae that is  
476 congruent with their diversity and abundance in the deep sea (e.g. Brix et al., 2018; Jażdżewska  
477 and Mamos, 2019). It is important to note however that more profound comparisons of species  
478 richness between cited regions are challenged due to different depth zones sampled in each of  
479 those studies.

480 High species richness in the CCZ was recorded also for other metazoan groups including, among  
481 others, Polychatea, Isopoda, Tanaidacea or Echinodermata (e.g. Janssen et al., 2015;  
482 Christodoulou et al., 2020; Kaiser et al., 2023; Bonifácio et al., 2024; Błażewicz et al., in review).  
483 Recent summary of the known diversity of Metazoa of CCZ revealed 5,578 spp. recorded in the  
484 region of which more than 92% are identified as morphospecies with only temporal name  
485 ascribed and may be considered as new to science (Rabone et al., 2023). In our study only 48 spp.  
486 were confirmed as belonging to species new to science with two already described and 27 in  
487 process of description (Jażdżewska et al., 2022; Jażdżewska and Horton, in prep). This  
488 constitutes less than 25% of all MOTUs found. However, this relatively low number derives from  
489 the fact that large part of the collection from the most recent expedition (MANGAN 2023) was  
490 only identified to the family level and further study of recognized MOTUs has not yet been  
491 conducted. The final identification of the recognized MOTUs was also often challenged by the  
492 presence of individuals that were severely damaged and lacked taxonomically important



493 characters. Nevertheless, possessing their barcodes will allow to identify them in the future when  
494 more individuals of given MOTU are collected.

495 Kaiser et al. (2023) summarizing the present knowledge of the diversity of Isopoda from CCZ  
496 demonstrated that among 361 MOTUs recorded majority (345 MOTUs) were collected with  
497 epibenthic sledge, additional 16 were sampled with box corer. In the case of Tanaidacea the  
498 comparison of sampling gears (BC vs. EBS) shown their influence on the taxonomic composition  
499 and recognized communities but not on the diversity indices (Błażewicz et al., in review).  
500 Although our study was focused on the EBS samples, non-pelagic Amphipoda, present in BC  
501 samples from MANGAN 2018 and MANGAN 2023 expeditions were also considered. Similarly  
502 to the study of Kaiser et al. (2023) they constituted only a small portion of all animals processed  
503 (23 individuals of which 21 sequences were obtained) and were ascribed to 13 MOTUs. This  
504 further reaffirm that only parallel usage of box corer and epibenthic sledge during monitoring  
505 studies may assure comprehensive evaluation of the biodiversity of CCZ areas.

506

#### 507 **4.2 Highly variable amphipod assemblages in the CCZ area**

508 The study of amphipod assemblages from BGR contractor areas based on discriminated MOTUs  
509 revealed great variability of all studied stations, high number of singletons and doubletons in the  
510 material and no association between the faunal similarity and geographic proximity. The more  
511 there is almost complete dissimilarity between East and West BGR areas. Due to unavailability of  
512 the full collection of Amphipoda from other contractor zones (UKSLR and OMS) and the APEI-  
513 06 we were not able to characterize the amphipod assemblages of these areas. Nevertheless, out  
514 of the six individuals from APEI-06 for which the sequences were obtained, each belonged to  
515 different species (with two new to science) and only one of them *Rhachotropis* sp. nov.  
516 (BOLD:AEB2577) was shared between CCZ and APEI-06. Low similarity between different  
517 contractor areas of the CCZ as well as uncertain representativeness of APEIs towards mining  
518 zones was already reported for other macrobenthic groups (e.g. Taboada et al., 2018; Błażewicz  
519 et al., 2019, in review; Brix et al., 2020; Bonifácio et al., 2020, 2021; Christodoulou et al., 2020;  
520 Washburn et al., 2021a, b; Kaiser et al., 2023). It is worth noting that the cited studies used  
521 merged results for each contractor zone, herewith we show that evenness and patchy distribution  
522 characteristic for deep-sea fauna (Kaiser et al., 2007) stand at the base of high dissimilarity also  
523 within single contractor area. The same phenomenon was recorded for Isopoda and Polychaeta in



French and German contractor areas (Janssen et al., 2015). The variability in the faunal assemblages of the study region both in the smaller (within contractor area) and larger (between eastern and western CCZ) scales may derive from various factors. Locally, it may be associated with nodule density that is very heterogenous and may change within a few tens to hundreds of meters (Peukert et al., 2018). However, by now the influence of this factor was proven only for some taxa, like sessile megafauna (Vanreusel et al., 2016) and in case of another peracarid group, Isopoda it was not confirmed (Kaiser et al., 2023). The presence of nodules may directly support the settlement of low mobile, tube building Amphipoda belonging to the infraorder Corophiida by providing hard substrate for constructing their tubes but even more importantly in an indirect way being the bedding for sessile fauna of other groups (cnidarian, sponges). These sedentary macro- or megabenthic taxa are known to provide the substrate for tube-dwelling amphipods in the deep sea (Brandt et al., 2018) as well as for representatives of other infraorders (family Amathillopsidae) that were found clinging on sessile sponges (Lörz and Horton, 2021; Sigwart et al., 2023). The latter were photographically documented also from the APEI-06 (Lörz and Horton, 2021) but not present in the studied samples, while Corophiida were not numerous. In contrary, majority of Amphipoda collected belonged to either moderately or highly mobile epibenthic (families Eusiridae and Pardaliscidae) or to the sediment-dwelling groups (families Oedicerotidae and Phoxocephalidae) (Brix et al., 2018). For these groups the presence or absence of nodules may not be of direct importance, particularly for the sediment-dwelling amphipods for which the type of sediment may play more important role. This determinant was suggested to shape amphipod assemblages in the Cascadia Abyssal Plain in NE Pacific that appeared to be clearly different between two sites separated by only 100 km (Dickinson and Carey, 1978). Here, within East BGR the stations span over ca. 200 km, while the distance between East and West BGR zones is over 2,000 km. The other factors that may influence diversity and the assemblages of CCZ abyssal fauna in the wider scale are depth and food availability. The potential influence of decreasing primary productivity in the surface waters towards West of the CCZ on the animal densities was observed for the whole macrofauna as well as for isopods, polychaetes separately (De Smet et al., 2017; Bonifácio et al., 2020; Washburn et al., 2021b; Kaiser et al., 2023). In the present case due to the semiquantitative character of EBS the densities between samples were not compared and there was no evidence that the two stations situated in the West BGR contractor zone exhibit lower diversity indexes (ES[50] or Shannon Index, Figure 11B). However, their



faunal composition distinctness may be associated with the primary production changing in the western direction. Another factor that may play a role here is the depth that is well known as a determinant influencing faunal composition in the deep sea (Rex et al., 2006). The high local variability of nodule coverage and sediment type as well as gradual decrease of depth and of primary productivity in CCZ surface waters towards West combined with still insufficient sampling hinder decision which of the cited factors may play the crucial role in shaping the abyssal communities of the region (see also Kaiser et al., 2023).

#### **4.3 Weak connectivity between western and eastern parts of the CCZ as well as other deep-sea regions and its implication to conservation programmes**

The start of deep-sea mining in the CCZ will have both direct and indirect impact on the abyssal communities and their recovery (Rolinski et al., 2001; Sharma et al., 2001; Washburn et al., 2021b). The estimations suggest that the recovery of the biochemical fluxes in the upper layer of the sediments may last over 200 years (Haffert et al., 2020), while the results of mining experiment in the Peru Basin already showed very slow faunal recovery and serious changes in the composition of communities in the disturbed sites after 26 years (Miljutin et al., 2011; Simon-Lledo et al., 2019). In order to minimise the severe impact that retrieval of nodules serve to the abyssal environment the system of Areas of Particular Environmental Interest that are put aside of any mining operations was adopted by ISA (ISA, 2012) with later modifications (ISA, 2021). All but one of them are situated outside the main zone prospected for deep-sea mining (Fig. 1) and it has been already suggested that they may not fulfil their role (Błażewicz et al., 2019; McQuaid et al., 2020; Washburn et al., 2021a, b; Uhlenkott et al., 2023). It is partly due to highly heterogenous deep-sea environment and multiple factors shaping the faunal communities making them highly variable within short distances. The important role in hindering fast recovery of impacted sites may also have small population sizes of deep-sea invertebrates expressed by the high number of singletons. In our case almost 50% of all MOTUs were collected only once or at a single station (Fig. 10). The small population sizes mean from one hand that in the event of disturbance there are no individuals available to recolonize impacted site in the near future. From the other hand, it can be expected that such species may also be more prone to extinction due to mining operations. Another issue associated with proposal of APEIs that are mostly situated around the CCZ are the distribution ranges of deep-sea species. Our study revealed that majority



586 of species recorded have distribution spanning to 200 km (Figure 10). That means that effective  
587 area planned as recovery source needs to be situated in relatively close vicinity of the mining  
588 zone. The distances between presently established APEIs in the latitudinal axis are within 500–  
589 750 km that seems sufficient for species with larger ranges, but for those with more local  
590 distribution such distances may be too large. Although we realize that our sampling was focused  
591 mainly on the eastern part of CCZ (with the station located within 300 km radius), still the  
592 distribution of large number of species was more restricted and suggests relatively low  
593 connectivity within the region. It is worth noting that some species may exhibit extensive ranges  
594 but due to their rarity they are rarely collected. If that is the case the disruption due to mining  
595 may not influence such species survival, nevertheless it will not allow recovery of impacted place  
596 shortly. Important point to consider is also that the movement of small invertebrates within CCZ  
597 may be facilitated or prevented by the deep-water bottom currents and local hydrological  
598 conditions. These are not fully recognized for the region. However, if the dominating currents in  
599 the bottom zones are directed longitudinally (as is the case for the surface ones), the migration of  
600 species may be more intensive in the East-West direction than the North-South. In such case the  
601 recolonization may be hindered also by the fact that the residual zones (APEIs) are situated North  
602 or South from the mining areas. Further studies based on samples collected both in the claim  
603 areas but particularly in the APEIs would help in resolving their usefulness as real conservation  
604 zones.

605 By now the studies of Amphipoda in the CCZ were focused on very specific ecological group –  
606 the scavengers – and listed just 23 amphipod taxa generally widely distributed across different  
607 contractor zones and APEIs (Patel et al., 2020; Bribiesca-Contreras et al., 2021; Mohrbeck et al.,  
608 2021, Supplementary Table S3). Present study revealed that the non-scavengers community is  
609 much more diverse and variable. The striking finding is that only 13% of MOTUs recorded  
610 appeared to be widely distributed (MOTUs found at stations at the distance of at least 900 km and  
611 those with range spanning out of the CCZ). ~~The more,~~ many of them belong to taxa considered as  
612 highly mobile scavengers or predators (Table 4). For three taxa the knowledge is insufficient to  
613 make final conclusions about their ecology. Interestingly, four other species recorded in this  
614 group belong to the family Oedicerotidae which representatives are recognized as sediment-  
615 dwelling deposit feeders or predators (Brix et al., 2018). The question arise how these brooding  
616 and less mobile taxa maintain large distributions. The explanation of this phenomenon may be



617 associated with the specific behaviour observed for some shallow-water oedicerotids who migrate  
618 into water column for reproduction (Brix et al., 2018). Nothing is known about the mating  
619 behaviour of deep-sea species from this family; however, Hendrycks and Conlan (2003) reported  
620 one of the species (*Oedicerina denticulata*) from sediment traps set at 50 m above the seafloor.  
621 This support the assumption that species of this family probably spend large part of their life in  
622 the sediment, but they may also occur in the water column while mating and migrate at larger  
623 distances during this period.

624 The above widely distributed species may be considered as the first recolonizers of the  
625 disturbed areas. It must be underlined however, that this set of taxa is very small and represent  
626 only a small portion of deep-sea functional groups. As a result one can expect that after  
627 disturbance event the recovering community will be largely impoverished both in terms of  
628 species richness and functional groups. It may lead to general uniformization of deep-sea  
629 assemblages and irreversible loss of presently observed specificity of CCZ bottom fauna.

630

## 631 **5 CONCLUSIONS and RECOMMENDATIONS**

632 Being the first extensive molecular study of the abyssal benthic Amphipoda of Clarion-  
633 Clipperton Zone it provides important extension to the barcode library of this group and of the  
634 abyssal fauna of the Pacific Ocean, in general. In combination with detailed (although still not  
635 finished) morphological identification and description of species new to science (presented in  
636 parallel elsewhere) it serves as a baseline for further studies including future monitoring based on  
637 eDNA.

638 It is next study showing high diversity and low connectivity of deep-sea faunal groups in the  
639 Clarion-Clipperton Zone underlining high specificity of the benthic assemblages of this region.  
640 Additionally, with present extent of sampling and knowledge it further supports previous  
641 suggestions of moderate or weak representativeness of Areas of Particular Environmental Interest  
642 for the mining zones.

643 In the time of discussions about the development of Regional Environmental Management Plans  
644 for the whole CCZ area the two main recommendations are to be made:  
645 1) to conduct more intensive sampling program of APEIs (of which some are virtually unstudied)  
646 parallel to monitoring studies of contractor zones with the goal to better assess their usefulness as  
647 reservoirs of biodiversity for the mining areas,



648 2) to include the epibenthic sledge among standard gears used for sampling in order to avoid  
649 missing important part of deep-sea fauna in the monitoring studies.

650

#### 651 **Data availability**

652 Datasets supporting this paper can be accessed online through the Barcode of Life Data Systems  
653 (boldsystems.org) in the data set “DS-AMPHICCZ” (dx.doi.org/10.5883/DS-AMPHICCZ). All  
654 sequences were also deposited in GenBank with the accession numbers: PQ734211 – PQ734784.

655

#### 656 **Author contributions (CRediT)**

657 Conceptualization – AMJ, PMA

658 Data curation – AMJ

659 Formal analysis – AMJ, KB

660 Funding acquisition – AMJ, PMA, AV

661 Investigation – AMJ, KB

662 Methodology – AMJ

663 Project administration – AMJ, PMA, AV

664 Resources – AMJ, PMA, AV

665 Visualization – AMJ

666 Writing – original draft – AMJ, KB

667 Writing – review & editing – AMJ, KB, PMA, AV

668

#### 669 **Competing interests**

670 authors declare that they have no conflict of interest.

671

#### 672 **Acknowledgements**

673 The ABYSSLINE cruises were funded by UK Seabed Resources Ltd. The MANGAN 2016,  
674 MANGAN 2018 and MANGAN 2023 cruises were funded by the BGR (Bundesanstalt für  
675 Geowissenschaften und Rohstoffe - German Federal Institute for Geosciences and Natural  
676 Resources). Both institutions are thanked for providing the research material published here. The  
677 authors also wish to thank the chief scientists, scientific teams and crews of the sea-going  
678 expeditions for their assistance in collecting the material.



The 3rd generation sequencing molecular analysis of material from the MANGAN 2023 cruise was conducted with support from a Polish National Science Centre grant (project no. 2022/45/B/NZ8/02667) to A.M.J. We gratefully acknowledge Polish high-performance computing infrastructure PLGrid (HPC Center:ACK Cyfronet AGH) for providing computer facilities and support within computational grant no. PLG/2024/016952. Furthermore, A.M.J. received financial support to visit the “Deutsches Zentrum für Marine Biodiversitätsforschung” (DZMB) in Wilhelmshaven from the German Academic Exchange Service (Deutscher Akademischer Austauschdienst - [DAAD]) within the program “Research Stays for University Academics and Scientists, 2019” (57440915) to study their collection of Pacific amphipods. This is publication XX of the Senckenberg am Meer Metabarcoding and DNA Laboratory.

689

#### Financial support

The ABYSSLINE cruises were funded by UK Seabed Resources Ltd. The MANGAN 2016, MANGAN 2018 and MANGAN 2023 cruises were funded by the BGR (Bundesanstalt für Geowissenschaften und Rohstoffe - German Federal Institute for Geosciences and Natural Resources).

The 3rd generation sequencing molecular analysis of material from the MANGAN 2023 cruise was conducted with support from a Polish National Science Centre grant (project no. 2022/45/B/NZ8/02667) to A.M.J. We gratefully acknowledge Polish high-performance computing infrastructure PLGrid (HPC Center:ACK Cyfronet AGH) for providing computer facilities and support within computational grant no. PLG/2024/016952. Furthermore, A.M.J. received financial support to visit the “Deutsches Zentrum für Marine Biodiversitätsforschung” (DZMB) in Wilhelmshaven from the German Academic Exchange Service (Deutscher Akademischer Austauschdienst - [DAAD]) within the program “Research Stays for University Academics and Scientists, 2019” (57440915) to study their collection of Pacific amphipods.

704

#### REFERENCES

Andrade, L. F. and Jazdzewska, A. M.: Two new abyssal Harpiniinae Barnard & Drummond, 1978 (Amphipoda, Phoxocephalidae) from the Clarion-Clipperton Zone, In: Jazdzewska, A. (Ed.), New deep-sea Amphipoda from Clarion-Clipperton Zone, ZooKeys @@@: #-##. <https://doi.org/10.3897/zookeys.@@@.140727>, 2025. (accepted for publication)



- 710 Astrin, J. J. and Stüben, P. E.: Phylogeny in cryptic weevils: molecules, morphology and new  
711 genera of western Palaearctic Cryptorhynchinae (Coleoptera: Curculionidae). *Invertebr. Syst.*,  
712 22, 503–522. <https://doi.org/10.1071/IS07057>, 2008.
- 713 Bandelt, H., Forster, P., Röhl, A.: Median-joining networks for inferring intraspecific  
714 phylogenies, *Mol. Biol. Evol.*, 16 (1), 37–48. 1999.
- 715 Barnard, J. L. and Karaman, G. S.: The families and genera of marine gammaridean Amphipoda  
716 (except marine gammaroids). Part 1 & 2, *Records of the Australian Museum Supplement*, 13,  
717 1–866, <https://doi.org/10.3853/j.0812-7387.13.1991.91>, 1991.
- 718 Barnard, J. L., and Shulenberger, E.: Clarification of the abyssal amphipod *Paralicella tenuipes*  
719 Chevreux, *Crustaceana* 31, 267–274, <https://doi.org/10.1163/156854076X00053>, 1976.
- 720 Biniek, K., Hendrycks, E. A., Jażdżewska, A. M.: A new species of *Pardalisca* Krøyer, 1842  
721 (Crustacea, Amphipoda, Pardaliscidae) from the Clarion-Clipperton Zone in the abyssal  
722 central east Pacific, In: Jażdżewska, A. (Ed.), *New deep-sea Amphipoda from Clarion-*  
723 *Clipperton Zone*, *ZooKeys* @@@: #-##. <https://doi.org/10.3897/zookeys.@@@.140692>,  
724 2025. (accepted for publication)
- 725 Błażewicz, M., Józwiak, P., Menot, L., Pabis, K.: High species richness and unique composition  
726 of the tanaidacean communities associated with five areas in the Pacific polymetallic nodule  
727 fields, *Progr. Oceanogr.*, 176, 102141, <https://doi.org/10.1016/j.pocean.2019.102141>, 2019.
- 728 Błażewicz, M., Desiderato, A., Jakiel, A., Palacios Theil, E., Gellert, M., Studzian, M.,  
729 Głuchowska, K., Pape, E., Passotti, F., Smith, S., Vink, A. and Kaiser, S.: As little as we know:  
730 Current understanding and future outlook of benthic tanaid diversity and distribution in the  
731 Clarion Clipperton Fracture Zone (CCZ), *Mar. Biodiv.* (in review).
- 732 Bober, S., Riehl, T., Henne, S. and Brandt, A.: New Macrostylidae (Isopoda) from the Northwest  
733 Pacific Basin described by means of integrative taxonomy with reference to geographical  
734 barriers in the abyss, *Zool. J. Linn. Soc.*, 182 (3), 549–603,  
735 <https://doi.org/10.1093/zoolinnean/zlx042>, 2018.
- 736 Bonifácio, P., Martínez Arbizu, P. and Menot, L.: Alpha and beta diversity patterns of polychaete  
737 assemblages across the nodule province of the eastern Clarion-Clipperton Fracture Zone  
738 (equatorial Pacific), *Biogeosciences*, 17 (4), 865–886, <https://doi.org/10.5194/bg-17-865-2020>,  
739 2020.



- 740 Bonifácio, P., Neal, L. and Menot, L.: Diversity of deep-sea scale-worms (Annelida, Polynoidae)  
741 in the Clarion-Clipperton Fracture Zone, *Front. Mar. Sci.*, 8, 656899,  
742 <https://doi.org/10.3389/fmars.2021.656899>, 2021.
- 743 Bonifácio, P., Kaiser, S., Washburn, T. W., Smith, C. R., Vink, A., and Arbizu, P. M.: Biodiversity  
744 of the Clarion-Clipperton Fracture Zone: a worm perspective, *Mar. Biodiv.*, 54 (1), 5,  
745 <https://doi.org/10.1007/s12526-023-01396-3>, 2024.
- 746 Bouckaert, R. R., and Drummond, A. J.: bModelTest: Bayesian phylogenetic site model  
747 averaging and model comparison, *BMC Evol. Biol.*, 17 (1), 42,  
748 <https://doi.org/10.1186/s12862-017-0890-6>, 2017.
- 749 Bouckaert, R., Vaughan, T. G., Barido-Sottani, J., Duchêne, S., Fourment, M., Gavryushkina, A.  
750 Heled, J., Jones, G., Kühnert, D., De Maio, N., Matschiner, M., Mendes, F. K., Müller, N. F.,  
751 Ogilvie, H. A., du Plessis, L., Poppinga, A., Rambaut, A., Rasmussen, D., Siveroni, I., Suchard,  
752 M. A., Wu, C.-H., Xie, D., Zhang, C., Stadler, T. and Drummond A. J.: BEAST 2.5: An  
753 advanced software platform for Bayesian evolutionary analysis, *PLoS Comput. Biol.*, 15 (4),  
754 e1006650, <https://doi.org/10.1371/journal.pcbi.1006650>, 2019.
- 755 Bousfield, E.L. and Hendrycks, E.A.: The amphipod superfamily Eusiroidea in the North  
756 American Pacific region. I. Family Eusiridae: systematics and distributional ecology,  
757 *Amphipacifica*, 1 (4), 3–59, 1995.
- 758 Brandt, A. and Barthel, D.: An improved supra- and epibenthic sledge for catching Peracarida  
759 (Crustacea, Malacostraca), *Ophelia*, 43, 15–23,  
760 <https://doi.org/10.1080/00785326.1995.10430574>, 1995.
- 761 Brandt, A., Alalykina, I., Fukumori, H., Golovan, O., Kniesz, K., Lavrenteva, A., Lörz, A.-N.,  
762 Malyutina, M., Philipps-Bussau, K. and Stransky, B.: First insights into macrofaunal  
763 composition from the SokhoBio expedition (Sea of Okhotsk, Bussol Strait and northern slope  
764 of the Kuril-Kamchatka Trench), *Deep-Sea Res. Part II* 154, 106–120,  
765 <https://doi.org/10.1016/j.dsr2.2018.05.022>, 2018.
- 766 Brandt A., Jazdzewska A. M., Kaiser S., Błazewicz M., Gerken S., Głuchowska K., Kelch A.,  
767 Preikshardt M., Knauber H., Kohlenbach K., Saeedi H., Tandberg A. H. S. and Di Franco D.:  
768 Macrofaunal epi- and suprabenthic taxa composition of the Bering Sea and Aleutian trench  
769 area (NE Pacific Ocean), *Prog. Oceanogr.*, 103376,  
770 <https://doi.org/10.1016/j.pocean.2024.103376>, 2025.



- 771 Brenke, N.: An Epibenthic Sledge for Operations on Marine Soft Bottom and Bedrock, *Mar.*  
772 *Technol. Soc. J.*, 39, 10–21. <https://doi.org/10.4031/002533205787444015>, 2005.
- 773 Bribiesca-Contreras, G., Dahlgren, T. G., Horton, T., Drazen, J. C., Drennan, R., Jones, D. O. B.,  
774 Leitner, A. B., McQuaid, K. A., Smith, C. R., Taboada, S., Wiklund, H. and Glover, A. G.:  
775 Biogeography and Connectivity Across Habitat Types and Geographical Scales in Pacific  
776 Abyssal Scavenging Amphipods, *Front. Mar. Sci.*, 8, 705237,  
777 <https://doi.org/10.3389/fmars.2021.705237>, 2021.
- 778 Brix, S., Lörz, A.-N., Jażdżewska, A., Hughes, L., Tandberg, A.H., Pabis, K., Stransky, B., Krapp-  
779 Schickel, T., Sorbe, J.-C., Hendrycks, E., Vader, W. J. M., Frutos, I., Horton, T., Jażdżewski,  
780 K., Peart, R., Beermann, J., Coleman, C. O., Buhl-Mortensen, L., Corbari, L., Havermans, C.,  
781 Tato, R. and Jimenez Campean, A.: Amphipod family distributions around Iceland, *Zookeys*,  
782 731, 41–53, <https://doi.org/10.3897/zookeys.731.19854>, 2018.
- 783 Brix, S., Osborn, K. J., Kaiser, S., Truskey, S. B., Schnurr, S. M., Brenke, N., Malyutina M. and  
784 Martinez Arbizu, P.: Adult life strategy affects distribution patterns in abyssal isopods–  
785 implications for conservation in Pacific nodule areas. *Biogeosciences*, 17 (23), 6163–6184,  
786 <https://doi.org/10.5194/bg-17-6163-2020>, 2020.
- 787 Browne, W. E., Haddock, S. H. and Martindale, M. Q.: Phylogenetic analysis of lineage  
788 relationships among hyperiid amphipods as revealed by examination of the mitochondrial  
789 gene, cytochrome oxidase I (COI), *Integr. Comp. Biol.*, 47 (6), 815–830,  
790 <https://doi.org/10.1093/icb/icm093>, 2007.
- 791 Christodoulou, M., O'Hara, T., Hugall, A. F., Khodami, S., Rodrigues, C. F., Hilario, A., Vink, A.  
792 and Martínez Arbizu, P.: Unexpected high abyssal ophiuroid diversity in polymetallic nodule  
793 fields of the Northeast Pacific Ocean, and implications for conservation, *Biogeosciences*, 17  
794 (7), 1845–1876, <https://doi.org/10.5194/bg-17-1845-2020>, 2020.
- 795 Dauby, P., Nyssen, F. and De Broyer, C.: Amphipods as food sources for higher trophic levels in  
796 the Southern Ocean: a synthesis, In: Huiskes, A.H.L., Gieskes, W.W.C., Rozema, J., Schorno,  
797 R.M.L., van der Vies, S.M. and Wolff W.J. (Eds.), *Antarctic Biology in a Global Context*,  
798 Backhuys Publishers, Leiden, the Netherlands, pp.129–134, 2003.
- 799 De Broyer, C., Scailteur, Y., Chapelle, G. and Rauschert, M.: Diversity of epibenthic habitats of  
800 gammaridean amphipods in the eastern Weddell Sea, *Polar Biol.*, 24, 744–753,  
801 <https://doi.org/10.1007/s003000100276>, 2001.



- 802 Dupont, D. W., Patel, T., Kochzius, M. and Schön, I.: Evidence for a single population expansion  
803 event across 24,000 km: the case of the deep-sea scavenging amphipod *Abyssorhomene*  
804 *distinctus*, *Hydrobiologia*, 851 (10), 2309–2327, <https://doi.org/10.1007/s10750-023-05447-5>,  
805 2024.
- 806 De Smet, B., Pape, E., Riehl, T., Bonifácio, P., Colson, L. and Vanreusel, A.: The community  
807 structure of deep-sea macrofauna associated with polymetallic nodules in the eastern part of  
808 the Clarion-Clipperton Fracture Zone, *Front. Mar. Sci.*, 4, 103,  
809 <https://doi.org/10.3389/fmars.2017.00103>, 2017.
- 810 Dickinson, J. J. and Carey Jr, A. G.: Distribution of gammarid Amphipoda (Crustacea) on  
811 Cascadia Abyssal Plain (Oregon), *Deep-Sea Res.*, 25 (1), 97–06,  
812 [https://doi.org/10.1016/S0146-6291\(21\)00008-4](https://doi.org/10.1016/S0146-6291(21)00008-4), 1978.
- 813 Enequist, P.: Studies on the soft-bottom amphipods of the Skagerak, *Zoologiska Bidrag Fran*  
814 *Uppsala*, 28, 297–492, 1949.
- 815 Ezard, T., Fujisawa, T., Barraclough, T. G.: Splits: species' limits by threshold statistics, R  
816 package version, 1(11), r29, 2009.
- 817 Felsenstein, J.: Phylogenies and the Comparative Method, *Am. Nat.*, 125, 1–15, 1985.
- 818 Folmer, O., Black, M., Hueh, W., Lutz, R., and Vrijenhoek, R.: DNA primers for amplification of  
819 mitochondrial cytochrome c oxidase subunit i from diverse metazoan invertebrates, *Mol. Mar.*  
820 *Biol. Biotechnol.*, 3, 294–299, 1994.
- 821 Frutos, I., Brandt, A. and Sorbe, J. C.: Deep-Sea Suprabenthic Communities: The Forgotten  
822 Biodiversity, In: Rossi, S., Bramanti, L., Gori, A. and Orejas, C., eds, *Marine Animal Forests*,  
823 Springer International Publishing, Cham, 475–503, 2017.
- 824 Fujii, T., Kilgallen, N. M., Rowden, A. A. and Jamieson, A. J.: Deep-sea amphipod community  
825 structure across abyssal to hadal depths in the Peru-Chile and Kermadec trenches. *Mar. Ecol.*  
826 *Prog. Ser.*, 492, 125–138, <https://doi.org/10.3354/meps10489>, 2013.
- 827 Haffert, L., Haeckel, M., de Stigter, H. and Janssen, F.: Assessing the temporal scale of deep-sea  
828 mining impacts on sediment biogeochemistry, *Biogeosciences*, 17 (10), 2767–2789,  
829 <https://doi.org/10.5194/bg-17-2767-2020>, 2020.
- 830 Hauquier, F., Macheriotou, L., Bezerra, T. N., Eggho, G., Martínez Arbizu, P. and Vanreusel, A.:  
831 Distribution of free-living marine nematodes in the Clarion-Clipperton Zone: implications for



- 832 future deep-sea mining scenarios, *Biogeosciences*, 16 (18), 3475–3489,  
833 <https://doi.org/10.5194/bg-16-3475-2019>, 2019.
- 834 Havermans, C.: Have we so far only seen the tip of the iceberg? Exploring species diversity and  
835 distribution of the giant amphipod *Eurythenes*, *Biodiversity*, 17, 12–25,  
836 <https://doi.org/10.1080/14888386.2016.1172257>, 2016.
- 837 Havermans, C., Nagy, Z. T., Sonet, G., De Broyer, C. and Martin, P.: Incongruence between  
838 molecular phylogeny and morphological classification in amphipod crustaceans: a case study  
839 of Antarctic lysianassoids, *Mol. Phylogenet. Evol.*, 55 (1), 202–209,  
840 <https://doi.org/10.1016/j.ympev.2009.10.025>, 2010.
- 841 Hebert, P. D., Ratnasingham, S. and De Waard, J. R.: Barcoding animal life: cytochrome *c*  
842 oxidase subunit 1 divergences among closely related species, *P. R. Soc. Lond. B. Bio.*, 270  
843 (suppl\_1), S96–S99, <https://doi.org/10.1098/rsbl.2003.0025>, 2003.
- 844 Hein, J. R., Mizell, K., Koschinsky, A., and Conrad, T. A.: Deep-ocean mineral deposits as a  
845 source of critical metals for high-and green-technology applications: Comparison with land-  
846 based resources, *Ore Geol. Rev.*, 51, 1–14. <https://doi.org/10.1038/s43017-020-0027-0>, 2013.
- 847 Hendrycks, E. A. and Conlan, K. E.: New and unusual abyssal gammaridean Amphipoda from  
848 the north-east Pacific, *J. Nat. Hist.*, 37, 2303–2368,  
849 <https://doi.org/10.1080/00222930210138926>, 2003.
- 850 Horton, T. and Lörz, A.-N.: A new genus and species of the family Lepechinellidae Schellenberg,  
851 1926 (Crustacea, Amphipoda) from the Clarion-Clipperton Zone, Pacific Ocean. *ZooKeys*  
852 (2025 accepted for publication).
- 853 Horton, T., Thurston, M. H., Vlierboom, R., Gutteridge, Z., Pebody, C. A., Gates, A. R. and Bett  
854 B. J.: Are abyssal scavenging amphipod assemblages linked to climate cycles? *Progr.*  
855 *Oceanogr.*, 184, 102318, <https://doi.org/10.1016/j.pocan.2020.102318>, 2020.
- 856 Horton T., Lowry J., De Broyer C., Bellan-Santini D., Copilaş-Ciocianu D., Corbari L., Costello  
857 M. J., Daneliya M., Dauvin J.-C., Fišer C., Gasca R., Grabowski M., Guerra-García J. M.,  
858 Hendrycks E., Hughes L., Jaume D., Jazdzewski K., Kim Y.-H., King R., Krapp-Schickel T.,  
859 LeCroy S., Lörz A.-N., Mamos T., Senna A.R., Serejo C., Souza-Filho J. F., Tandberg A. H.,  
860 Thomas J. D., Thurston M., Vader W., Väinölä R., Valls Domedel G., Vonk R., White K.,  
861 Zeidler W.: World Amphipoda Database, Accessed at



- 862 <https://www.marinespecies.org/amphipoda> on 2025-04-12, <https://doi.org/10.14284/368>,  
863 2025a.
- 864 Horton, T., Stewart, E., Hendrycks, E. and Valls Domedel, G.: A revision of the genus *Eperopeus*  
865 Mills, 1967 (Crustacea, Amphipoda, Pardaliscidae) with the addition of a new species from the  
866 Clarion-Clipperton Zone, Central Pacific Ocean. ZooKeys (2025b).
- 867 Horton, T., Valls Domedel, G. and Hendrycks, E.: A new species of *Thrombasia* J.L. Barnard,  
868 1966 (Crustacea, Amphipoda, Tryphosidae) from the Clarion-Clipperton Zone, Central Pacific  
869 Ocean, ZooKeys (2025c accepted for publication).
- 870 Horton, T., Valls Domedel, G., Stewart, E. and Hendrycks, E.: A revision of the genus *Elimedon*  
871 J.L. Barnard, 1962 (Crustacea, Amphipoda, Tryphosidae) with the addition of two new species  
872 from the Clarion-Clipperton Zone, Central Pacific Ocean. ZooKeys (2025d accepted for  
873 publication).
- 874 Horton, T., Valls Domedel, G., Stewart, E. and Thurston, M. H. A new superfamily and family of  
875 the infraorder Hadziida (Amphipoda, Senticaudata) based on a new genus and species from  
876 the Clarion-Clipperton Zone, Pacific Ocean, ZooKeys (2025e accepted for publication).
- 877 Hou, Z., Fu, J. and Li, S.: A molecular phylogeny of the genus *Gammarus* (Crustacea:  
878 Amphipoda) based on mitochondrial and nuclear gene sequences. Mol. Phylogeny. Evol., 45,  
879 596–611, <https://doi.org/10.1016/j.ympev.2007.06.006>, 2007.
- 880 Hubert, N. and Hanner, R.: DNA barcoding, species delineation and taxonomy: a historical  
881 perspective, DNA barcodes, 3 (1), 44–58, <https://doi.org/10.1515/dna-2015-0006>, 2015.
- 882 Hughes, L., Tandberg, A. H. S.: *Bathymedon* Sars, 1895 (Oedicerotidae Liljeborg 1865:  
883 Amphipoda: Crustacea) from the Clarion Clipperton Zone, ZooKeys (2025a).
- 884 Hughes, L., Tandberg, A. H. S.: Synopiidae Dana, 1853 (Amphipoda, Crustacea) of the Clarion  
885 Clipperton Zone, ZooKeys (2025b).
- 886 IISD Reporting Services: Summary of the Twenty-fifth Annual Session of the International  
887 Seabed Authority (Second Part): 15-26 July 2019, Earth Negotiations Bulletin, 25 (207), 1–21,  
888 2019.
- 889 ISA: A geological model of polymetallic nodule deposits in the Clarion-Clipperton Fracture  
890 Zone. National Library of Jamaica Cataloguing: International Seabed Authority Technical  
891 Study No. 6. 211 pp. 2010.



- 892 ISA: Decision of the Council relating to an environmental management plan for the Clarion-  
893 Clipperton Zone. ISBA/18/C/22. International Seabed Authority, Kingston, Jamaica.  
894 [https://www.isa.org.jm/wp-content/uploads/2022/06/isba-18c-22\\_0.pdf](https://www.isa.org.jm/wp-content/uploads/2022/06/isba-18c-22_0.pdf), 2012.
- 895 ISA: Decision of the Council of the International Seabed Authority relating to the review of the  
896 environmental management plan for the Clarion-Clipperton Zone. ISBA/26/C/58.  
897 International Seabed Authority, Kingston, Jamaica. [https://www.isa.org.jm/wp-](https://www.isa.org.jm/wp-content/uploads/2022/06/ISBA_26_C_58_E.pdf)  
898 [content/uploads/2022/06/ISBA\\_26\\_C\\_58\\_E.pdf](https://www.isa.org.jm/wp-content/uploads/2022/06/ISBA_26_C_58_E.pdf), 2021.
- 899 Jamieson, A. J., Kilgallen, N. M., Rowden, A. A., Fujii, T., Horton, T., Lörz, A. N., Kitazawa K.  
900 and Priede I.G.: Bait-attending fauna of the Kermadec Trench, SW Pacific Ocean: Evidence  
901 for an ecotone across the abyssal–hadal transition zone, Deep-Sea Res. Part I, 58, 49–62,  
902 <https://doi.org/10.1016/j.dsr.2010.11.003>, 2011.
- 903 Janssen, A., Kaiser, S., Meißner, K., Brenke, N., Menot, L. and Martínez Arbizu, P.: A reverse  
904 taxonomic approach to assess macrofaunal distribution patterns in abyssal pacific polymetallic  
905 nodule fields, PLoS One, 10, 1–26, <https://doi.org/10.1371/journal.pone.0117790>, 2015.
- 906 Jazdzewska, A., Horton, T.: Introduction to the Special Issue of ZooKeys related to the  
907 description of new species from Clarion-Clipperton Zone. ZooKeys (in prep).
- 908 Jazdzewska, A. M., Mamos, T.: High species richness of Northwest Pacific deep-sea amphipods  
909 revealed through DNA barcoding. Progr. Oceanogr., 178, 102184,  
910 <https://doi.org/10.1016/j.pocean.2019.102184>, 2019.
- 911 Jazdzewska, A. M., Horton, T., Hendrycks, E., Mamos, T., Driskell, A., Brix, S., Martínez  
912 Arbizu P.: Pandora's box in the deep sea - intraspecific diversity patterns and distribution of  
913 two congeneric scavenging amphipods, Front. Mar. Sci., 8, 750180,  
914 <https://doi.org/10.3389/fmars.2021.750180>, 2021.
- 915 Jazdzewska, A. M., Brandt, A., Martínez Arbizu, P., Vink, A.: Exploring the diversity of the deep  
916 sea – four new species of amphipod genus *Oedicerina* described using morphological and  
917 molecular methods. Zool. J. Linn. Soc., 194, 181–225,  
918 <https://doi.org/10.1093/zoolinnean/zlab032>, 2022.
- 919 Jones, D. O., Kaiser, S., Sweetman, A. K., Smith, C. R., Menot, L., Vink A., Trueblood, D.,  
920 Greinert, J., Billett, D. S. M., Martinez Arbizu, P., Radziejewska, T., Singh, R., Ingole, B.,  
921 Stratmann, T., Simon-Lledó, E., Durden, J. M. and Clark, M. R.: Biological responses to



- 922 disturbance from simulated deep-sea polymetallic nodule mining, PLoS One, 12 (2),  
923 e0171750, <https://doi.org/10.1371/journal.pone.0171750>, 2017.
- 924 Kaiser, S., Christodoulou, M., Janssen, A. Kihara T.C., Mohrbeck I., Pasotti F., Schnurr S.M.,  
925 Vink A. and Martínez Arbizu, P.: Diversity, distribution and composition of abyssal benthic  
926 Isopoda in a region proposed for deep-seafloor mining of polymetallic nodules: a synthesis,  
927 Mar. Biodivers., 53, 30, <https://doi.org/10.1007/s12526-023-01335-2>, 2023.
- 928 Kaiser, S., Barnes, D. K. and Brandt, A.: Slope and deep-sea abundance across scales: Southern  
929 Ocean isopods show how complex the deep sea can be, Deep-Sea Res. Part II, 54, 1776–1789,  
930 <https://doi.org/10.1016/j.dsr.2.2007.07.006>, 2007.
- 931 Katoh, K. and Standley, D. M.: MAFFT Multiple Sequence Alignment Software Version 7:  
932 Improvements in Performance and Usability, Mol. Biol. Evol., 30, 772–780,  
933 <https://doi.org/10.1093/molbev/mst010>, 2013.
- 934 Katoh, K., Misawa, K., Kuma, K. and Miyata, T.: MAFFT: a novel method for rapid multiple  
935 sequence alignment based on fast Fourier transform, Nucleic Acids Res., 30, 3059–3066,  
936 <https://doi.org/10.1093/nar/gkf436>, 2002.
- 937 Kniesz, K., Jażdżewska, A. M., Martínez Arbizu, P. and Kihara, T. C.: DNA barcoding of  
938 scavenging amphipod communities at active and inactive hydrothermal vents in the Indian  
939 Ocean. Front. Mar. Sci., 8, 752360, <https://doi.org/10.3389/fmars.2021.752360>, 2022.
- 940 Knox, M. A., Hogg, I. D., Pilditch, C. A., Garcia-R, J. C., Hebert, P. D. and Steinke, D.:  
941 Contrasting patterns of genetic differentiation for deep-sea amphipod taxa along New  
942 Zealand's continental margins. Deep-Sea Res. Part I, 162, 103323.  
943 <https://doi.org/10.1016/j.dsr.2020.103323>, 2020.
- 944 Lefaible, N., Macheriotou, L., Purkiani, K., Haeckel, M., Zeppilli, D., Pape, E. and Vanreusel, A.:  
945 Digging deep: lessons learned from meiofaunal responses to a disturbance experiment in the  
946 Clarion-Clipperton Zone, Mar. Biodiv., 53 (4), 48, [https://doi.org/10.1007/s12526-023-01353-](https://doi.org/10.1007/s12526-023-01353-0)  
947 [0](https://doi.org/10.1007/s12526-023-01353-0), 2023.
- 948 Lefaible, N., Macheriotou, L., Pape, E., Molari, M., Haeckel, M., Zeppilli, D. and Vanreusel, A.:  
949 Industrial mining trial for polymetallic nodules in the Clarion-Clipperton Zone indicates  
950 complex and variable disturbances of meiofaunal communities, Front. Mar. Sci., 11, 1380530,  
951 <https://doi.org/10.3389/fmars.2024.1380530>, 2024.



- 952 Lörz, A. N. and Horton, T.: Investigation of the Amathillopsidae (Amphipoda, Crustacea),  
953 including the description of a new species, reveals a clinging lifestyle in the deep sea  
954 worldwide, *ZooKeys*, 1031, 19, <https://doi.org/10.3897/zookeys.1031.62391>, 2021.
- 955 Lörz, A.-N., Jażdżewska, A. M. and Brandt, A.: A new predator connecting the abyssal with the  
956 hadal in the Kuril-Kamchatka Trench, NW Pacific, *PeerJ* 6, e4887,  
957 <https://doi.org/10.7717/peerj.4887>, 2018.
- 958 Lörz, A.-N., Engel, L., Jereczek, H., Ćwierz, N. and Jażdżewska, A. M.: Eusiridae (Amphipoda,  
959 Crustacea) of the Clarion-Clipperton-Zone in the abyssal east Pacific with description of five  
960 new species, *ZooKeys* (2025 accepted for publication).
- 961 Lowry, J.K. and Myers, A.A.: A phylogeny and classification of the Amphipoda with the  
962 establishment of the new order Ingolfiellida (Crustacea: Peracarida), *Zootaxa*, 4265 (1), 1–89,  
963 <https://doi.org/10.11646/zootaxa.4265.1.1>, 2017.
- 964 Magurran, A. E.: *Measuring biological diversity*, Blackwell, Oxford, p 256, 2004.
- 965 McLellan, B., Corder, G., Ali, S., Golev, A.: Rare metals, unconventional resources and  
966 sustainability, In: Wessel G. R. and Greenberg J. K. (Eds.), *Geosciences for the Public Good*  
967 and *Global Development: Toward a Sustainable Future*: Geological Society of America  
968 Special Paper, 520, 57–65, [https://doi.org/10.1130/2016.2520\(07\)](https://doi.org/10.1130/2016.2520(07)), 2016.
- 969 McQuaid, K. A., Attrill, M. J., Clark, M. R., Cobley, A., Glover, A. G., Smith, C. R. and Howell  
970 K. L.: Using Habitat Classification to Assess Representativity of a Protected Area Network in  
971 a Large, Data-Poor Area Targeted for Deep-Sea Mining. *Front. Mar. Sci.* 7, 558860,  
972 <https://doi.org/10.3389/fmars.2020.558860>, 2020.
- 973 Miljutin, D. M., Miljutina, M. A., Arbizu, P. M. and Galéron, J.: Deep-sea nematode assemblage  
974 has not recovered 26 years after experimental mining of polymetallic nodules (Clarion-  
975 Clipperton Fracture Zone, tropical eastern Pacific). *Deep-Sea Res. Part I*, 58 (8), 885–897,  
976 <https://doi.org/10.1016/j.dsr.2011.06.003>, 2011.
- 977 Mohrbeck, I., Horton, T., Jażdżewska, A.M., and Martínez Arbizu, P.: DNA-barcoding and  
978 Cryptic Diversity of Deep-Sea Scavenging Amphipods in the Clarion-Clipperton Zone  
979 (Eastern Equatorial Pacific), *Mar. Biodiver.*, 51, 26, [https://doi.org/10.1007/s12526-021-](https://doi.org/10.1007/s12526-021-01170-3)  
980 [01170-3](https://doi.org/10.1007/s12526-021-01170-3), 2021.
- 981 Monaghan, M. T., Wild, R., Elliot, M., Fujisawa, T., Balke, M., Inward, D. J., Lees, D. C.,  
982 Ranaivosolo, E., Eggleton, P., Barraclough, T. G. and Vogler, A. P.: Accelerated species



- 983 inventory on Madagascar using coalescent-based models of species delineation, *Syst. Biol.* 58,  
984 298–311, <https://doi.org/10.1093/sysbio/syp027>, 2009.
- 985 Pasotti, F., Mevenkamp, L., Pape, E., Błażewicz, M., Bonifácio, P., Riehl, T., De Smet, B.,  
986 Lefaible, N., Lins, L. and Vanreusel, A.: A local scale analysis of manganese nodules  
987 influence on the Clarion-Clipperton Fracture Zone macrobenthos. *Deep-Sea Res. Part I*, 168,  
988 103449, <https://doi.org/10.1016/j.dsr.2020.103449>, 2021.
- 989 Patel, T., Robert, H., d'Udekem d'Acoz, C., Martens, K., De Mesel, I., Degraer, S. and Schön, I.:  
990 Biogeography and community structure of abyssal scavenging Amphipoda (Crustacea) in the  
991 Pacific Ocean, *Biogeosciences*, 17, 2731–2744, <https://doi.org/10.5194/bg-17-2731-2020>,  
992 2020.
- 993 Peart, R. and Lörz, A.-N.: A new species from the genus *Lepechinelloides* Thurston, 1980  
994 (Amphipoda, Lepechinellidae) from the Clarion-Clipperton Zone, Pacific Ocean. *ZooKeys*  
995 (2025).
- 996 Peart, R. and Stewart, E.: Two new species from two genera of the family Ampeliscidae Krøyer,  
997 1842 (Crustacea: Amphipoda) from the Clarion-Clipperton Zone, Pacific Ocean. *ZooKeys*  
998 (2025).
- 999 Peukert, A., Schoening, T., Alevizos, E., Köser, K., Kwasnitschka, T. and Greinert, J.:  
1000 Understanding Mn-nodule distribution and evaluation of related deep-sea mining impacts  
1001 using AUV-based hydroacoustic and optical data, *Biogeosciences*, 15 (8), 2525–2549,  
1002 <https://doi.org/10.5194/bg-15-2525-2018>, 2018.
- 1003 Pons, J., Barraclough, T. G., Gomez-Zurita, J., Cardoso, A., Duran, D. P., Hazell, S., Kamoun S.,  
1004 Sumlin W.D. and Vogler A. P.: Sequence-based species delimitation for the DNA taxonomy of  
1005 undescribed insects, *Syst. Biol.*, 55, 595–609, <https://doi.org/10.1080/10635150600852011>,  
1006 2006.
- 1007 Preciado, I., Cartes, J. E., Punzón, A., Frutos, I., López-López, L. and Serrano, A.: Food web  
1008 functioning of the benthopelagic community in a deep-sea seamount based on diet and stable  
1009 isotope analyses, *Deep Sea Res. Part II*, 137, 56–68, 2017.
- 1010 Puillandre, N., Brouillet, S. and Achaz, G.: ASAP: assemble species by automatic partitioning,  
1011 *Mol. Ecol. Res.*, 21 (2), 609–620, <https://doi.org/10.1111/1755-0998.13281>, 2021.
- 1012 QGIS.org: QGIS Geographic Information System, QGIS Association, <http://www.qgis.org>, 2021.



- 1013 R Core Team: R: A language and environment for statistical computing. R Foundation for Statistical  
1014 Computing, Vienna, Austria. URL <https://www.R-project.org/> 2021.
- 1015 Rabone, M., Wiethase, J. H., Simon-Lledó, E., Emery, A. M., Jones, D. O., Dahlgren, T. G.,  
1016 Bribiesca-Contreras, G., Wiklund, H., Horton, T. and Glover, A. G.: How many metazoan  
1017 species live in the world's largest mineral exploration region?, *Curr. Biol.*, 33 (12), 2383-  
1018 2396. <https://doi.org/10.1016/j.cub.2023.04.052>, 2023.
- 1019 Rambaut, A., Drummond, A. J., Xie, D., Baele, G. and Suchard, M. A. Posterior summarization  
1020 in Bayesian phylogenetics using Tracer 1.7, *Syst. Biol.*, 67 (5), 901,  
1021 <https://doi.org/10.1093/sysbio/syy032>, 2018.
- 1022 Ratnasingham, S. and Hebert, P.: The Barcode of Life Data System, *Mol. Ecol. Notes*, 7(3), 355–  
1023 364, <https://doi.org/10.1111/j.1471-8286.2007.01678.x>, 2007.
- 1024 Ratnasingham, S. and Hebert, P. D. N.: A DNA-Based Registry for All Animal Species: The  
1025 Barcode Index Number (BIN) System, *PLoS One* 8, e66213,  
1026 <https://doi.org/10.1371/journal.pone.0066213>, 2013.
- 1027 Raupach, M. J., Rulik, B. and Spelda, J.: Surprisingly high genetic divergence of the  
1028 mitochondrial DNA barcode fragment (COI) within Central European woodlice species  
1029 (Crustacea, Isopoda, Oniscidea), *ZooKeys*, 1082, 103–125,  
1030 <https://doi.org/10.3897/zookeys.1082.69851>, 2022.
- 1031 Rex, M. A., Etter, R. J., Morris, J. S., Crouse, J., McClain, C. R., Johnson, N. A., Stuart, C. T.,  
1032 Deming, J. W., Thies, R. and Avery, R.: Global bathymetric patterns of standing stock and  
1033 body size in the deep-sea benthos, *Mar. Ecol. Progr. Ser.* 317, 1–8,  
1034 <https://doi.org/10.3354/meps317001>, 2006.
- 1035 Riehl, T., Brenke, N., Brix, S., Driskell, A., Kaiser, S. and Brandt A.: Field and laboratory  
1036 methods for DNA studies on deep-sea isopod crustaceans, *Pol. Polar Res.*, 35 (2), 203–224,  
1037 <https://doi.org/10.2478/popore-2014-0018>, 2014.
- 1038 Rolinski, S., Segschneider, J. and Sundermann, J.: Long-term propagation of tailings from deep-  
1039 sea mining under variable conditions by means of numerical simulations. *Deep-Sea Res. Pt II*,  
1040 48, 3469–3485, [https://doi.org/10.1016/S0967-0645\(01\)00053-4](https://doi.org/10.1016/S0967-0645(01)00053-4), 2001.
- 1041 Rühlemann, C. and Shipboard Scientific Party: Geology, Biodiversity and Environment of the  
1042 German license area for the exploration of polymetallic nodules in the equatorial NE Pacific.



- 1043 Cruise Report of R/V KILO MOANA Cruise MANGAN 2016, BGR, Hannover, 299 pp.,  
1044 2017.
- 1045 Rühlemann, C.: Short Cruise Report, FS SONNE SO262, Guayaquil (Ecuador)–Suva (Fidschi),  
1046 05.04-29.05.2018, Federal Institute for Geosciences and Natural Resources, Hannover,  
1047 Germany, pp: 1–11, 2018.
- 1048 Rühlemann, C., Bardenhagen, M., Brown, R., Dambrowski, G., Dietzel, K., Florez, L.,  
1049 Henningsen, A., Kaiser, P., Kayser, A., Kefel, O., Lüttke, T., Maschmann, N., Obuya, W.,  
1050 Oketch, F., Schiele, K., Schiller, F., Silber, R., Sturm, S., Wedemeyer, H. and Wöhr, C.:  
1051 MANGAN 2023 Cruise Report. Geology, Biodiversity and Environment of the BGR Contract  
1052 Area for the Exploration of Polymetallic Nodules in the Equatorial NE Pacific. Honolulu, -  
1053 Honolulu, Hawaii, 9th April – 20th May 2023. Federal Institute for Geosciences and Natural  
1054 Resources, Hannover, Germany, pp: 1–277, 2023.
- 1055 Saitou, N. and Nei, M.: The neighbor-joining method: a new method for reconstructing  
1056 phylogenetic trees, *Mol. Biol. Evol.*, 4, 406–425, 1987.
- 1057 Seefeldt, M. A., Campana, G. L., Deregibus, D., Quartino, M. L., Abele, D., Tollrian, R., Held,  
1058 C.: Different feeding strategies in Antarctic scavenging amphipods and their implications for  
1059 colonisation success in times of retreating glaciers, *Front. Zool.*, 14, 1–15,  
1060 <https://doi.org/10.1186/s12983-017-0248-3>, 2017.
- 1061 Sharma, R., Nagender Nath, B., Parthiban, G. and Jai Sankar, S.: Sediment redistribution during  
1062 simulated benthic disturbance and its implications on deep seabed mining, *Deep-Sea Res. Pt*  
1063 *II*, 48, 3363–3380, [https://doi.org/10.1016/S0967-0645\(01\)00046-7](https://doi.org/10.1016/S0967-0645(01)00046-7), 2001.
- 1064 Sigwart, J. D., Brandt, A., Di Franco, D., Escobar Briones, E., Gerken, S., Gooday, A. J., Grimes,  
1065 C. J., Głuchowska, K., Hoffmann, S., Jażdżewska, A. M., Kamyab, E., Kelch, A., Knauber, H.,  
1066 Kohlenbach, K., Miguez-Salas, O., Moreau, C., Ogawa, A., Poliseno, A., Santín Muriel, A.,  
1067 Tandberg, A. H. S., Theising, F. I., Walter, T., Wölfl, A.-C. and Chen, C.: Heterogeneity in the  
1068 abyssal plains: a case study in the Bering Sea, *Front. Mar. Sci.*, 9, 1037482,  
1069 <https://doi.org/10.3389/fmars.2022.1037482>, 2023.
- 1070 Simon-Lledó, E., Bett, B. J., Huvenne, V. A., Köser, K., Schoening, T., Greinert, J. and Jones, D.  
1071 O. Biological effects 26 years after simulated deep-sea mining, *Sci. rep.*, 9 (1), 8040,  
1072 <https://doi.org/10.1038/s41598-019-44492-w>, 2019.



- 1073 Smith, C. R., Dahlgren, T. G., Drazen, J., Gooday, A., Glover, A. G., Kurras, G., Martinez-  
1074 Arbizu, P., Schulse, C., Spickermann, R., Sweetman, A. K., and Vetter, E.: Abyssal baseline  
1075 study (ABYSSLINE) cruise report, Seafloor Investigations Report, 2013, 1–160, 2013.
- 1076 Smith, C. R., Church, M., Chow, J., Dahlgren, T. G., Drazen, J., Glover, A. G., Gooday, A., Kaylan,  
1077 B., Lui, B., Kurras, G., Martinez-Arbizu, P., Sweetman, A. K., Tan, K. S. and Vetter E. Abyssal  
1078 Baseline Study (ABYSSLINE) Cruise Report. Seafloor Investigations Report 2015-1408-061J-  
1079 SRDL-AB02, 2015.
- 1080 Srivathsan, A., Lee, L., Katoh, K., Hartop, E., Kutty, S. N., Wong, J., Yeo D. and Meier, R.:  
1081 ONTbarcode and MinION barcodes aid biodiversity discovery and identification by everyone,  
1082 for everyone, BMC biology, 19, 1–21, <https://doi.org/10.1186/s12915-021-01141-x>, 2021.
- 1083 Srivathsan, A., Loh, R. K., Ong, E. J., Lee, L., Ang, Y., Kutty, S. N. and Meier, R.: Network  
1084 analysis with either Illumina or MinION reveals that detecting vertebrate species requires  
1085 metabarcoding of iDNA from a diverse fly community, Mol. Ecol., 32 (23), 6418–6435,  
1086 <https://doi.org/10.1111/mec.16767>, 2023.
- 1087 Taboada, S., Riesgo, A., Wiklund, H., Paterson, G. L., Koutsouveli, V., Santodomingo, N., Dale,  
1088 A. C., Smith, C. R., Jones, D. O. B., Dahlgren, T. G. and Glover, A. G.: Implications of  
1089 population connectivity studies for the design of marine protected areas in the deep sea: An  
1090 example of a demosponge from the Clarion-Clipperton Zone, Mol. Ecol., 27 (23), 4657–4679,  
1091 <https://doi.org/10.1111/mec.14888>, 2018.
- 1092 Tamura, K., Stecher, G. and Kumar, S.: MEGA11: Molecular Evolutionary Genetics Analysis  
1093 version 11, Mol. Biol. Evol., 38, 3022–3027, <https://doi.org/10.1093/molbev/msab120>, 2021.
- 1094 Tandberg, A. H. S. and Hughes, L. Stilipedidae Holmes, 1908 of the Clarion Clipperton Zone  
1095 (Amphipoda, Crustacea). ZooKeys (2025).
- 1096 Timm, R., Stewart, E., Lörz, A.-N., Horton, T. Two new species of *Liljeborgia* Spence Bate, 1863  
1097 (Crustacea, Amphipoda, Liljeborgiidae) from the Clarion-Clipperton Zone, Pacific Ocean,  
1098 ZooKeys (2025 accepted for publication).
- 1099 Tong, S. J. W., Gan, B. Q. and Tan, K. S.: Community structure of deep-sea benthic metazoan  
1100 meiofauna in the polymetallic nodule fields in the eastern Clarion-Clipperton Fracture Zone,  
1101 Pacific Ocean, Deep-Sea Res., Part I, 188, 103847, <https://doi.org/10.1016/j.dsr.2022.103847>,  
1102 2022.



- 1103 Uhlenkott, K., Meyn, K., Vink, A. and Martínez Arbizu, P.: A review of megafauna diversity and  
1104 abundance in an exploration area for polymetallic nodules in the eastern part of the Clarion  
1105 Clipperton Fracture Zone (North East Pacific), and implications for potential future deep-sea  
1106 mining in this area, *Mar. Biodiv.*, 53 (2), 22, <https://doi.org/10.1007/s12526-022-01326-9>,  
1107 2023.
- 1108 Vanreusel, A., Hilario, A., Ribeiro, P. A., Menot, L. and Arbizu, P. M.: Threatened by mining,  
1109 polymetallic nodules are required to preserve abyssal epifauna, *Sci. Rep.*, 6, 26808,  
1110 <https://doi.org/10.1038/srep26808>, 2016.
- 1111 Verheye, M. L., Backeljau, T., and d'Udekem d'Acoz, C.: Looking beneath the tip of the iceberg:  
1112 diversification of the genus *Epimeria* on the Antarctic shelf (Crustacea, Amphipoda), *Polar*  
1113 *Biol.*, 39, 925–945, <https://doi.org/10.1007/s00300-016-1910-5>, 2016.
- 1114 Wang, Q., Bönigk, S., Böhm, V., Gehring, N., Altmüller, J. and Dieterich, C.: Single-cell  
1115 transcriptome sequencing on the Nanopore platform with ScNapBar, *Rna*, 27(7), 763–770,  
1116 <https://doi.org/10.1261/rna.078154.120>, 2021.
- 1117 Washburn, T., Jones, D. O. B., Wei, C-L. and Smith, C. R.: Environmental heterogeneity  
1118 throughout the Clarion-Clipperton Zone and the potential representativity of the APEI  
1119 network, *Front. Mar. Sci.*, 8, 661685, <https://doi.org/10.3389/fmars.2021.661685>, 2021a
- 1120 Washburn, T., Menot, L., Bonifácio, P., Pape, E. and Błażewicz, M. Patterns of macrofaunal  
1121 biodiversity across the Clarion-Clipperton Zone: an area targeted for seabed mining. *Front.*  
1122 *Mar. Sci.*, 8, 626571, <https://doi.org/10.3389/fmars.2021.626571>, 2021b
- 1123 Wiklund, H., Neal, L., Glover, A. G., Drennan, R., Rabone, M. and Dahlgren, T. G.: Abyssal  
1124 fauna of polymetallic nodule exploration areas, eastern Clarion-Clipperton Zone, central  
1125 Pacific Ocean: Annelida: Capitellidae, Opheliidae, Scalibregmatidae, and Traviidae,  
1126 *ZooKeys*, 883, 1–82, <https://doi.org/10.3897/zookeys.1137.86150>, 2019.
- 1127 Wróblewski, B. and Jazdzewska, A.: A new species of *Lepidepecreum* (Tryphosidae, Amphipoda,  
1128 Crustacea) from the Clarion-Clipperton Zone in the abyssal east Pacific, *ZooKeys* (2025  
1129 accepted for publication).
- 1130
